# Supplementary material for: The enantioselective total synthesis of (+)-clusianone
Source: Royal Society of Chemistry journal article supplement (doi:10.1039/c4cc09701g), 2014-12-22
Supplement: c4cc09701g1.pdf [file c4cc09701g1.pdf]

## Supplementary Information

### The Enantioselective Total Synthesis of (+)-Clusianone

*Fiene Horeischi, Claudia Guttroff, and Bernd Plietker\**

Institut für Organische Chemie, Universität Stuttgart, Pfaffenwaldring 55, DE-70569

Stuttgart, Germany.

[bernd.plietker@oc.uni-stuttgart.de](mailto:bernd.plietker@oc.uni-stuttgart.de)

#### **Part I**

Stereoselective course of the asymmetric Tsuji-Trost allylation 2

#### **Part II**

Experimental procedures 4

#### **Part III**

Select NMR-Spectra 20

#### **Part IV**

Additional Information 28

#### **Part V**

References 38

## Part I

### Stereoselective course of the asymmetric Tsuji-Trost allylation

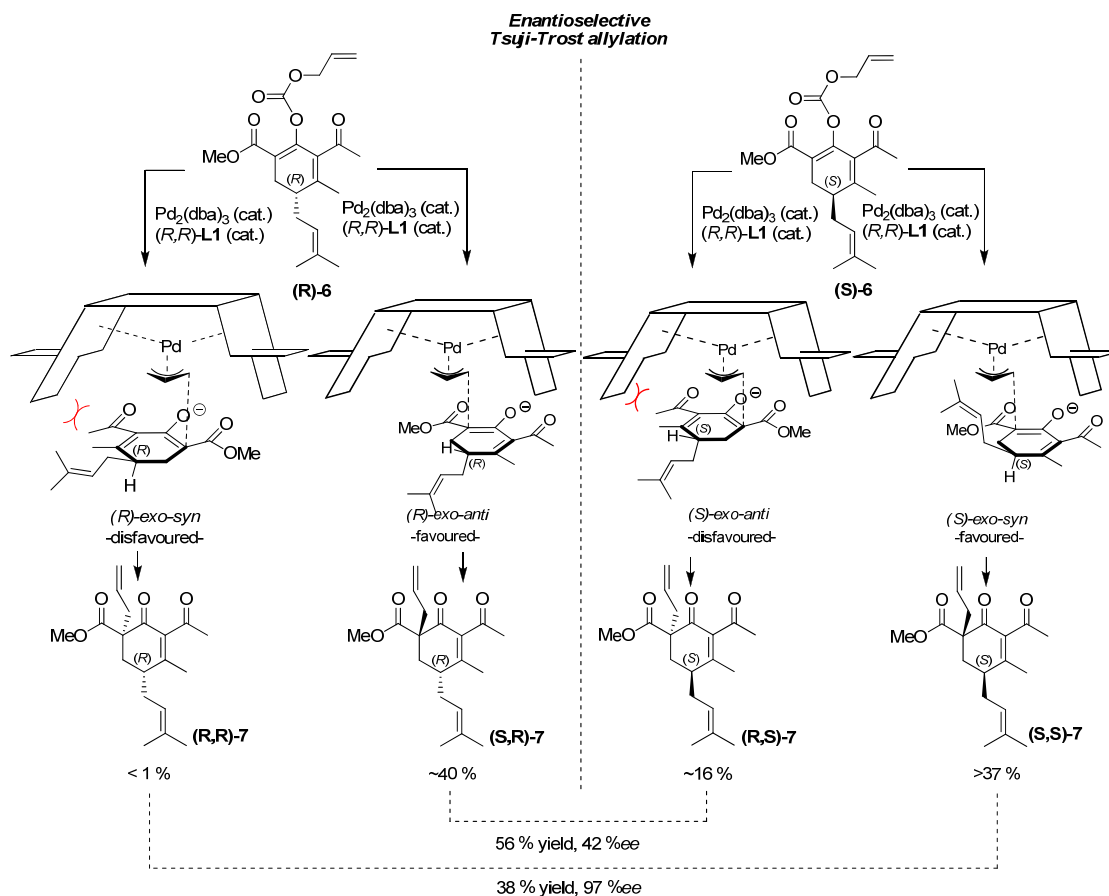

**Scheme 1.** Rationale for the stereoselective course of the asymmetric Tsuji-Trost allylation

The enantiodifferentiation of the asymmetric Tsuji-Trost allylation might be rationalized using the commonly accepted mnemonic device developed by Trost. Assuming, that an *endo*-orientation of the bulky nucleophile can be discarded, four different diastereomeric transition state (TS) models have to be considered. The (*R*)-*exo-syn* TS displays the strongest interaction between one phenyl flap of the phosphine ligand and the exocyclic acyl-group in the nucleophile. In addition, the methyl- and isoprenylgroups also interact with the ligand. The TS is strongly disfavoured. However, the steric repulsions are not found in the diastereomeric (*R*)-*exo-anti* TS. All the groups mentioned above are pointing into the open side of the ligand, resulting in a high degree of diastereoselectivity for the (*R*)-series in favour of the formation of the 2,4-*trans*-allylated cyclohexenone (**(S,R)**-7). Inversion of the configuration at C4 leads to more complex TS's. The (*S*)-*exo-anti* TS shows a weak

interaction between the exocyclic acyl group and one aryl flap of the phosphine ligand. The diastereomeric (S)-*exo-syn* TS is lacking this interaction but shows a small steric repulsion between ligand and iso-prenyl group. The diastereoselectivity within this series is only about 2.1 : 1 in favour of the *cis*-allylated cyclohexenone **(S,S)-7**. In summary, the *trans*-diastereomer is formed as a mixture of 40 % **(S,R)-7** and 16 % of the enantiomeric **(R,S)-7**. The *cis*-product however shows high levels of enantioenrichment due to the very unfavourable formation of *cis*-enantiomer **(R,R)-7**.

## Part II

### Experimental procedures

#### General Remarks

All reactions and manipulations which are sensitive to air or moisture were performed under dry nitrogen by using standard Schlenk techniques. All solvents were purified prior to use. All chemicals were purchased from Acros Organics, Sigma Aldrich or Alfa Aesar. Reactions were monitored with thin layer chromatography on 0.20 mm Macherey – Nagel Alugram Xtra Sil silica gel plates. Purification via semi-preparative HPLC was carried out with a Knauer System, pump K-501 and RI-detector K-2400, and a Nucleodur 100-5 Si (250 mm x 20 mm) column. NMR spectra were recorded on a spectrometer at 300 MHz ( $^1\text{H}$ -NMR), 75 MHz ( $^{13}\text{C}$ -NMR) from Burker Avance 300 or on a spectrometer at 500 MHz ( $^1\text{H}$ -NMR), 125.6 MHz ( $^{13}\text{C}$ -NMR) from Bruker Avance 500.  $^1\text{H}$ -chemical shifts are expressed in ppm with residual chloroform ( $\delta = 7.26$  ppm) as reference. Chemical shifts ( $\delta$ ) are reported with multiplicity (s = singlet, d = doublet, t = triplet, dd = doublet of doublets, m = multiplet) and coupling constants ( $J$ ) in Hz.  $^{13}\text{C}$ -chemical shifts are reported as chemical shifts ( $\delta$ ) with residual chloroform ( $\delta = 77.16$  ppm) as internal reference. IR spectra were measured on a FT-IR spectrometer, Vektor 22 from Bruker, in an ATR mode. Mass spectra were measured using electrospray ionization on a Bruker Micro-TOF-Q.

## General procedures GP-I – GP-IV:

### General procedure I (GP-I):<sup>[1]</sup>

Substrate (335 mg, 1 mmol, 1 eq.) was dissolved in dimethyl formamide (5 mL) and cooled to 0 °C. Sodium hydride (60% in mineral oil, 48 mg, 1.2 mmol, 1.2 eq.) was added portionwise and after one hour allyl chloroformate (160 µL, 1.5 mmol, 1.5 eq.) was added. The reaction mixture was stirred over night at room temperature. The solution was quenched with sat. NH<sub>4</sub>Cl-solution (5 mL) and extracted with ethyl acetate (3 x 10 mL). The combined organic layers were washed with brine, dried over Na<sub>2</sub>SO<sub>4</sub>, filtered and concentrated in vacuo. The crude product was purified via column chromatography.

### General procedure II (GP-II):<sup>[2]</sup>

LiCl (428 mg, 10.1 mmol, 2.05 eq.) was heated at 80 °C for 3 h under vacuo (1 mbar). THF (40 mL) and CuI (1.90 g, 10 mmol, 2 eq.) were added at room temperature. After stirring for 5 minutes at this temperature the suspension was cooled to -78 °C and the methylmagnesium bromide (3 M in THF, 10 mmol, 2 eq.), TMSCl (1.28 mL, 10 mmol, 2 eq.) and a solution of corresponding educt (5 mmol, 1 eq.) in THF (30 mL) were successively added. The resulting mixture was stirred at -78 °C for 5 h. The reaction was hydrolysed with NH<sub>4</sub>Cl/2N HCl (1:1, 100 mL) and extracted with ethyl acetate (3 x 100 mL). The combined organic layers were washed with NH<sub>4</sub>Cl/NH<sub>3</sub> (1:1, until the organic layer was colourless), brine, dried over Na<sub>2</sub>SO<sub>4</sub> filtered and concentrated in vacuo. The crude product was purified via flash chromatography.

### General procedure III (GP-III):<sup>[1]</sup>

Tris(dibenzylideneacetone)dipalladium(0) (23 mg, 25 µmol, 0.05 eq.) and Tri(*p*-tolyl)phosphine (38 mg, 0.125 mmol, 0.25 eq.) were dissolved in 1,4-dioxane (5 mL) and stirred for 15 min. at 60 °C. Substrate was added dissolved in 1,4-dioxane (1 mL). The resulting mixture was stirred at 60 °C for 1 h and then filtered through silica (petroleum ether/ethyl acetate, 5:1) The crude product was purified via HPLC. The product was isolated as a mixture of diastereomers.

## Preparation of compound 6:

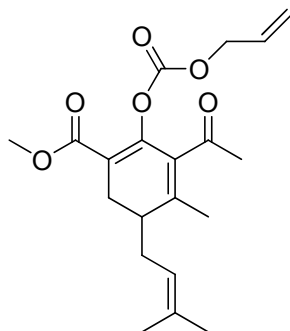

6

The corresponding diester<sup>[2]</sup> (10 mmol, 1 eq.) was dissolved in THF (30 mL) cooled to 0 °C and NaH (60% in mineral oil, 440 mg, 11 mmol, 1.1 eq.) was added portionwise. After stirring for 1 h at this temperature methyllithium (1.6 M in THF, 14.4 mL, 23 mmol, 2.3 eq.) was added dropwise and the mixture was stirred for 3 h at 0 °C. The solution was hydrolysed with sat. NH<sub>4</sub>Cl-solution (3 mL) and extracted with ethyl acetate (3 x 25 mL). The combined organic layers were washed with brine, dried over Na<sub>2</sub>SO<sub>4</sub>, filtered and concentrated in vacuo. The crude product was used without further purification.

According to **GP-I** crude product (400 mg, 1.44 mmol) was treated with sodium hydride (60% in mineral oil, 68.6 mg, 1.72 mmol) and allyl chloroformate (287 μL, 2.16 mmol) to yield **6** after HPLC (silica gel, petroleum ether/ethyl acetate; 6:1) as a yellow oil (470 mg, 1.29 mmol, 78%).

**R<sub>f</sub>** = 0.58 (petroleum ether/ ethyl acetate 6:1); **<sup>1</sup>H-NMR** (CDCl<sub>3</sub>, 500 MHz) δ 5.99 - 5.91 (m, 1H), 5.47 - 5.29 (m, 2H), 5.10 - 5.00 (m, 1H), 4.71 - 4.68 (m, 2H), 3.73 (s, 3H), 2.72 - 2.67 (m, 2H), 2.60 - 2.55 (m, 1H), 2.30 (s, 3H), 2.23 - 2.18 (m, 1H), 2.14 - 2.05 (m, 2H), 1.94 (s, 3H), 1.71 (s, 3H), 1.54 (s, 3H) ppm;

**<sup>13</sup>C-NMR** (CDCl<sub>3</sub>, 125 MHz) δ 201.5, 165.6, 151.6, 150.8, 148.7, 134.9, 132.3, 131.0, 121.1, 119.4, 111.1, 69.4, 51.8, 40.1, 31.6, 28.0, 26.2, 25.8, 19.7, 17.5 ppm; **IR** (film) ν 2912 (w), 1766 (s), 1698 (s), 1433 (m), 1233 (s), 1181 (s) cm<sup>-1</sup>; **GC/MS** (EI, 70 eV): m/z 385 (100); **HRMS** [C<sub>20</sub>H<sub>26</sub>O<sub>6</sub>]:calculated 385.1622, found: 385.1633.

## Preparation of compounds (S,R)-7, (R,S)-7 and (S,S)-7: <sup>[3]</sup>

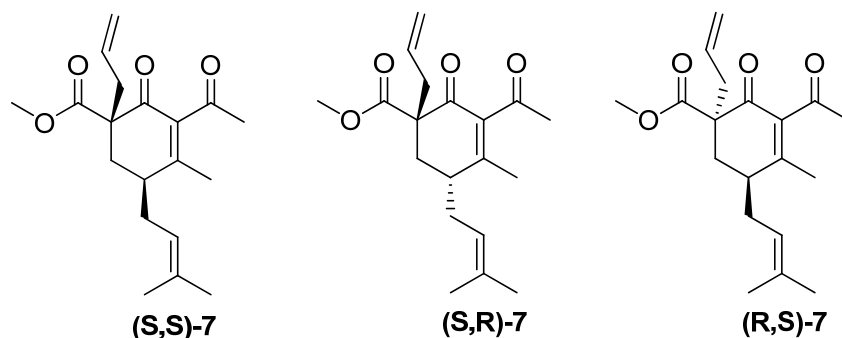

Substrate **6** (45.3 mg, 0.125 mmol, 1 eq.) was placed in a test tube under nitrogen and was dissolved in solvent (3.75 mL). The solution was cooled to 0°C and a premixed orange solution of Pd<sub>2</sub>(dba)<sub>3</sub> (1.03 mg, 0,001 mmol) and the corresponding Ligand (0,003 mmol) was added to the reaction mixture. The resulting solution was stirred for 18 h and then filtered through silica. The obtained yellow oil was purified via HPLC (silica gel, petroleum ether/ethyl acetate; 6:1) to yield products **7** (37.8 mg, 0.11 mmol, 95%) as a yellow oil and a mixture of diastereomers (cis:trans 1:1.9). Enantiomeric excess was determined by chiral HPLC (AD-H, heptane/isopropanol 90:10).

**R<sub>f</sub>** = 0.27 – 0.31 (petroleum ether/ ethyl acetate 10:1);

Diastereomere *cis*: **<sup>1</sup>H-NMR** (CDCl<sub>3</sub>, 500 MHz) δ 5.78 - 5.71 (m, 1H), 5.10 - 5.05 (m, 2H), 5.00 – 4.95 (m, 1H), 3.71 (s, 3H), 2.66 - 2.59 (m, 2H), 2.51 - 2.45 (m, 1H), 2.43 – 2.32 (m, 2H), 2.28 (s, 3H), 2.21 – 2.14 (m, 1H), 1.88 (s, 3H), 1.71 (s, 3H), 1.60 (s, 3H), 1.57 – 1.52 (m, 2H) ppm; **<sup>13</sup>C-NMR** (CDCl<sub>3</sub>, 125 MHz) δ 203.5, 193.4, 171.3, 160.6, 140.3, 135.0, 132.8, 119.4, 118.9, 56.4, 52.4, 38.8, 38.5, 34.9, 31.0, 30.5, 25.8, 19.2, 18.0 ppm; **IR** (film) ν 2915 (w), 1734 (s), 1703 (s), 1674 (s), 1434 (m), 1353 (m), 1206 (s), 1157 (s) cm<sup>-1</sup>; **GC/MS** (EI, 70 eV): m/z 397 (12), 357 (21), 341 (100), 301 (3); **HRMS** [C<sub>19</sub>H<sub>26</sub>O<sub>4</sub>]:calculated 341.1723, found: 341.1715. [α]<sub>D</sub><sup>20</sup>: +25.2 (c = 3.53, CHCl<sub>3</sub>)

Diastereomere *trans*: **<sup>1</sup>H-NMR** (CDCl<sub>3</sub>, 500 MHz) δ 5.83 - 5.76 (m, 1H), 5.15 - 5.10 (m, 2H), 5.08 – 5.04 (m, 1H), 3.75 (s, 3H), 2.70 - 2.65 (m, 1H), 2.50 - 2.38 (m, 3H), 2.30 (s, 3H), 2.29 – 2.26 (m, 1H), 2.15 – 2.05 (m, 2H), 1.94 (s, 3H), 1.72 (s, 3H), 1.62 (s, 3H) ppm; **<sup>13</sup>C-NMR** (CDCl<sub>3</sub>, 125 MHz) δ 203.9, 194.4, 172.3, 160.5, 138.8, 134.8, 133.3, 120.3, 119.1, 56.1, 52.4, 37.9, 37.4, 32.8, 31.3, 30.4, 25.8, 19.4, 18.0 ppm; **IR** (film) ν 2918 (w), 1737 (s), 1703 (s), 1660 (s), 1435 (m), 1279 (s) cm<sup>-1</sup>; **GC/MS** (EI, 70 eV): m/z 341 (100), 319 (2); **HRMS** [C<sub>19</sub>H<sub>26</sub>O<sub>4</sub>]:calculated 341.1723, found: 341.1725. [α]<sub>D</sub><sup>20</sup>: +5.9 (c = 3.53, CHCl<sub>3</sub>)

### Preparation of compound 8:

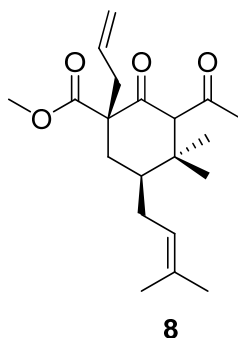

According to **GP-II 7** (34 mg, 0.1 mmol) was treated with lithium chloride (18 mg, 0.2 mmol), copper iodide (82 mg, 0.2 mmol), methylmagnesium bromide (3 M in Et<sub>2</sub>O, 0.14 mL, 0.2 mmol) and TMSCl (55  $\mu$ L, 0.2 mmol) to yield product **8** after flash chromatography (silica gel, petroleum ether/ethyl acetate; 6:1) as yellow oil (31 mg, 0.09 mmol, 91%).

**R<sub>f</sub>** = 0.35 (petroleum ether/ethyl acetate 10:1); **<sup>1</sup>H-NMR** (CDCl<sub>3</sub>, 300 MHz):  $\delta$  5.80 - 5.72 (m, 1H), 5.15 - 5.11 (m, 1H), 5.08 - 5.01 (m, 2H), 3.78 (s, 3H) 3.58 (s, 1H), 2.59 - 2.54 (m, 1H), 2.51 - 2.46 (m, 1H), 2.33 - 2.27 (m, 1H), 2.22 - 2.16 (m, 1H), 2.11 (s, 3H), 1.74 (s, 3H), 1.69 - 1.61 (m, 1H), 1.59 (s, 3H), 1.58 - 1.52 (m, 1H), 1.32 - 1.26 (m, 1H), 1.08 (s, 3H), 0.97 (s, 3H) ppm; **<sup>13</sup>C-NMR** (CDCl<sub>3</sub>, 125 MHz):  $\delta$  204.2, 203.8, 171.9, 133.1, 132.8, 122.5, 118.6, 71.7, 61.3, 52.5, 45.7, 43.4, 39.2, 37.1, 32.1, 27.2, 26.2, 25.8, 17.9, 15.4 ppm; **IR** (film):  $\nu$  = 2916 (w), 1724 (s), 1709 (s), 1436 (m), 1355 (m), 1285 (s) cm<sup>-1</sup>; **MS** (ESI):  $m/z$  (%) = 357 (100), 335 (31); **HRMS**: [C<sub>20</sub>H<sub>30</sub>O<sub>4</sub> + Na] calculated: 357.2036, found: 357.2039.

### Preparation of compound 9:

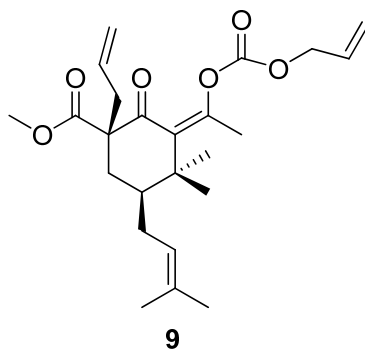

According to **GP-I** substrate (577 mg, 2.07 mmol) was treated with sodium hydride (60% in mineral oil, 99.5 mg, 2.48 mmol) and allyl chloroformate (331  $\mu$ L, 3.1 mmol)



to yield **9** after purification by HPLC (silica gel, petroleum ether/ethyl acetate; 10:1) as a yellow oil (788 mg, 1.88 mmol, 91%).

$R_f$  = 0.57 (petroleum ether/ethyl acetate 10:1);  $^1\text{H-NMR}$  ( $\text{CDCl}_3$ , 300 MHz):  $\delta$  5.95 - 5.87 (m, 1H), 5.77 - 5.67 (m, 1H), 5.38 - 5.26 (m, 2H), 5.11 - 5.06 (m, 3H), 4.62 - 4.58 (m, 2H), 3.70 (s, 3H), 2.54 - 2.51 (m, 2H), 2.28 (s, 3H), 2.16 - 2.10 (m, 1H), 2.02 - 1.98 (m, 1H), 1.71 (s, 3H), 1.70 - 1.61 (m, 2H), 1.59 (s, 3H), 1.47 - 1.42 (m, 1H), 1.09 (s, 3H), 1.08 (s, 3H) ppm;  $^{13}\text{C-NMR}$  ( $\text{CDCl}_3$ , 125 MHz):  $\delta$  203.9, 173.4, 152.4, 143.3, 141.8, 133.3, 133.0, 131.0, 122.8, 119.5, 118.8, 69.2, 52.4, 49.9, 41.6, 39.9, 38.1, 33.2, 27.5, 25.8, 25.0, 20.9, 17.9 ppm; **IR** (film):  $\nu$  = 2969 (w), 1763 (m), 1733 (m), 1698 (m), 1444 (m), 1364 (m), 1225 (s), 1134 (m)  $\text{cm}^{-1}$ ; **MS** (ESI):  $m/z$  (%) = 441 (100); **HRMS**: [ $\text{C}_{24}\text{H}_{34}\text{O}_6 + \text{Na}$ ] calculated: 441.2248, found: 441.2248.

### Preparation of compound **10**:

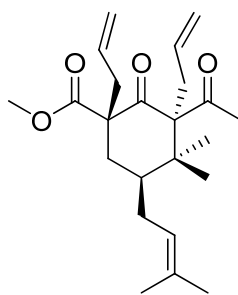

**10**

According to **GP-III 9** (56.0 mg, 0.13 mmol) were treated with tris(dibenzylideneacetone)dipalladium(0) (6.0 mg, 6.6  $\mu\text{mol}$ ) and tri(*p*-tolyl)phosphine (10.0 mg, 33.0  $\mu\text{mol}$ ) to yield product **10** (46.3 mg, 0.12 mmol, 95%) after purification by HPLC (silica gel, petroleum ether/ethyl acetate; 20:1).

$R_f$  = 0.62 (petroleum ether/ethyl acetate 10:1);  $^1\text{H-NMR}$  ( $\text{CDCl}_3$ , 300 MHz):  $\delta$  5.72 - 5.60 (m, 1H), 5.27 - 5.21 (m, 2H), 5.16 - 5.10 (m, 2H), 4.94 - 4.87 (m, 2H), 3.65 (s, 3H), 3.03 - 2.99 (m, 1H), 2.77 - 2.73 (m, 1H), 2.64 - 2.60 (m, 1H), 2.46 - 2.41 (m, 1H), 2.23 - 2.10 (m, 6H), 1.76 (s, 3H), 1.75 - 1.71 (m, 1H), 1.63 (s, 3H), 1.48 - 1.42 (m, 1H), 0.94 (s, 3H), 0.89 (s, 3H) ppm;  $^{13}\text{C-NMR}$  ( $\text{CDCl}_3$ , 125 MHz):  $\delta$  206.6, 205.9, 170.2, 133.3, 133.0, 132.5, 122.8, 119.8, 117.3, 74.9, 59.3, 52.3, 41.8, 41.2, 39.0, 34.6, 33.4, 32.8, 27.9, 25.8, 22.1, 22.0, 18.0 ppm; **IR** (film):  $\nu$  = 3078 (w), 2975 (w), 1733 (m), 1697 (s), 1393 (m), 1276 (m), 1213 (m)  $\text{cm}^{-1}$ ; **MS** (ESI):  $m/z$  (%) = 397 (100); **HRMS**: [ $\text{C}_{23}\text{H}_{34}\text{O}_4 + \text{Na}$ ] calculated: 397.2349, found: 397.2363.

### Preparation of compound 13:

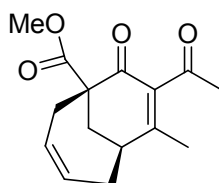

13

To a solution of **(S,S)-7** (399 mg, 1.25 mmol, 1 eq.) in DCM (10 mL) was added Grubbs II (10.6 mg, 1.25  $\mu$ mol, 1 mol-%). The reaction mixture was stirred at 45 °C over night. After cooling to room temperature and filtration over silica, crude product was purified by HPLC (silica gel, petroleum ether/ethyl acetate; 5:1) to yield **13** (235 mg, 0.9 mmol, 73%) as a colourless oil.

$R_f$  = 0.16 (petroleum ether/ ethyl acetate 6:1);  $^1\text{H-NMR}$  ( $\text{CDCl}_3$ , 500 MHz)  $\delta$  5.76 - 5.70 (m, 1H), 5.66 - 5.60 (m, 1H), 3.71 (s, 3H), 3.02 - 2.94 (m, 2H), 2.71 - 2.67 (m, 1H), 2.58 - 2.52 (m, 3H), 2.30 (s, 3H), 2.11 - 2.05 (m, 1H), 1.93 (s, 3H) ppm;  $^{13}\text{C-NMR}$  ( $\text{CDCl}_3$ , 125 MHz)  $\delta$  203.5, 194.6, 173.3, 160.5, 141.4, 128.7, 127.7, 53.2, 52.6, 39.5, 36.3, 36.2, 32.4, 31.5, 20.3 ppm; **IR** (film)  $\nu$  2952 (w), 1736 (s), 1703 (s), 1655 (s), 1351 (m), 1246 (m), 1104 (s), 1062 (s)  $\text{cm}^{-1}$ ; **GC/MS** (EI, 70 eV):  $m/z$  285 (100); **HRMS** [ $\text{C}_{15}\text{H}_{18}\text{O}_4$ ]:calculated 285.1097, found: 285.1089.  $[\alpha]_D^{20}$ : +14.7 ( $c$  = 3.53,  $\text{CHCl}_3$ )

### Preparation of precursor to 11:

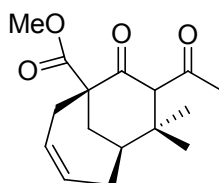

According to **GP-II 13** (235 mg, 0.9 mmol) was treated with lithium chloride (75.5 mg, 1.8 mmol), copper iodide (341 mg, 1.8 mmol), methylmagnesium bromide (3 M in  $\text{Et}_2\text{O}$ , 0.6 mL, 1.8 mmol) and  $\text{TMSCl}$  (228  $\mu\text{L}$ , 1.8 mmol) to yield product after flash chromatography (silica gel, petroleum ether/ethyl acetate; 6:1) as yellow oil (205 mg, 0.74 mmol, 82%).

$R_f$  = 0.50 - 0.46 (petroleum ether/ ethyl acetate 6:1);  $^1\text{H-NMR}$  ( $\text{CDCl}_3$ , 500 MHz)  $\delta$  5.94 - 5.86 (m, 1H), 5.67 - 5.61 (m, 1H), 4.02 (s, 1H), 3.76 (s, 3H), 3.18 - 3.12 (m,

1H), 2.78 - 2.66 (m, 3H), 2.36 – 2.30 (m, 1H), 2.13 (s, 3H), 2.04 - 1.94 (m, 1H), 1.77 - 1.73 (m, 1H), 1.32 (s, 3H), 1.11 (s, 3H) ppm; <sup>13</sup>C-NMR (CDCl<sub>3</sub>, 125 MHz) δ 207.7, 205.5, 173.2, 130.8, 126.5, 70.3, 58.5, 52.7, 41.2, 41.1, 38.2, 37.0, 32.9, 31.9, 27.0, 26.2 ppm; IR (film) ν 2953 (w), 2879 (w), 1734 (s), 1695 (s), 1432 (m), 1217 (s) cm<sup>-1</sup>; GC/MS (EI, 70 eV): m/z 301 (100), 279 (3); HRMS [C<sub>16</sub>H<sub>22</sub>O<sub>4</sub>+Na]: calculated: 301.1410, found: 301.1410.

### Preparation of compounds 11a and 11b:

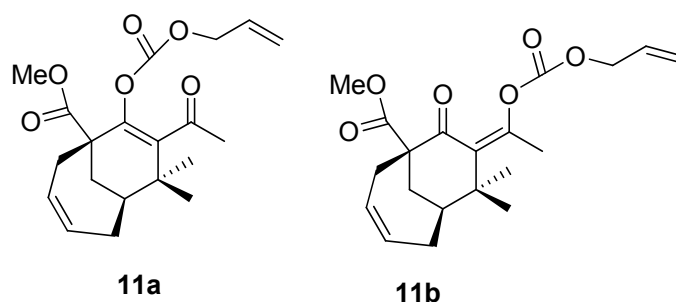

Substrate (147 mg, 0.53 mmol, 1 eq.) was dissolved in dimethyl formamide (3 mL) and cooled to 0 °C. Sodium hydride (60% in mineral oil, 25 mg, 0.63 mmol, 1.2 eq.) was added portionwise and after one hour allyl chloroformate (85.0 μL, 0.80 mmol, 1.5 eq.) was added. The reaction mixture was stirred over night at room temperature. The solution was quenched with sat. NH<sub>4</sub>Cl-solution (5 mL) and extracted with ethyl acetate (3 x 10 mL). The combined organic layers were washed with brine, dried over Na<sub>2</sub>SO<sub>4</sub>, filtered and concentrated in vacuo. The crude product was purified via HPLC (silica gel, petroleum ether/ethyl acetate; 5:1) to yield product **11a** and **11b** (214 mg, 0.5 mmol, 97%) as a yellow oil and a mixture of regioisomers (a:b 1:1).

**Regioisomere a:** R<sub>f</sub> = 0.47 (petroleum ether/ethyl acetate 4:1); <sup>1</sup>H-NMR (CDCl<sub>3</sub>, 500 MHz): δ 6.00 - 5.91 (m, 1H), 5.73 – 5.68 (m, 1H), 5.58 – 5.53 (m, 1H), 5.43 – 5.30 (m, 2H), 4.70 – 4.68 (m, 2H), 3.72 (s, 3H), 3.05 – 3.00 (m, 1H), 2.86 – 2.82 (m, 1H), 2.59 - 2.53 (m, 1H), 2.27 - 2.08 (m, 3H), 2.07 (s, 3H), 1.73 – 1.69 (m, 1H), 1.35 (s, 3H), 1.27 (s, 3H) ppm; <sup>13</sup>C-NMR (CDCl<sub>3</sub>, 125 MHz): δ 202.8, 173.6, 155.0, 151.8, 133.1, 131.0, 128.5, 126.7, 119.5, 69.0, 56.4, 52.6, 42.5, 42.2, 35.9, 34.3, 29.3, 29.2, 26.4, 20.1 ppm; IR (Film): ν = 2953 (w), 1757 (m), 1738 (m), 1688 (m), 1552 (m), 1208 (s), 1164 (s), 1097 (m) cm<sup>-1</sup>; GC/MS (EI, 70 eV): m/z 385 (100); HRMS: [C<sub>20</sub>H<sub>26</sub>O<sub>6</sub> + Na] calculated: 385.1622, found: 385.1620.

**Regioisomere b:**  $R_f = 0.41$  (petroleum ether/ethyl acetate 4:1);  $^1\text{H-NMR}$  ( $\text{CDCl}_3$ , 500 MHz):  $\delta$  6.00 - 5.91 (m, 1H), 5.73 - 5.68 (m, 1H), 5.58 - 5.53 (m, 1H), 5.43 - 5.30 (m, 2H), 4.70 - 4.68 (m, 2H), 3.72 (s, 3H), 3.05 - 3.00 (m, 1H), 2.86 - 2.82 (m, 1H), 2.59 - 2.53 (m, 1H), 2.27 - 2.08 (m, 3H), 2.07 (s, 3H), 1.73 - 1.69 (m, 1H), 1.35 (s, 3H), 1.27 (s, 3H) ppm;  $^{13}\text{C-NMR}$  ( $\text{CDCl}_3$ , 125 MHz):  $\delta$  202.8, 173.6, 155.0, 151.8, 133.1, 131.0, 128.5, 126.7, 119.5, 69.0, 56.4, 52.6, 42.5, 42.2, 35.9, 34.3, 29.3, 29.2, 26.4, 20.1 ppm; **IR** (Film):  $\nu = 2953$  (w), 1757 (m), 1738 (m), 1688 (m), 1552 (m), 1208 (s), 1164 (s), 1097 (m)  $\text{cm}^{-1}$ ; **GC/MS** (EI, 70 eV):  $m/z$  385 (100), 283 (58); **HRMS**: [ $\text{C}_{20}\text{H}_{26}\text{O}_6 + \text{Na}$ ] calculated: 385.1622, found: 385.1619.

### Preparation of compound 12:

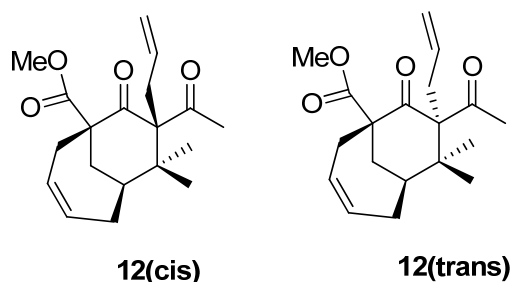

According to **GP-III 11** (216 mg, 0.58 mmol) were treated with tris(dibenzylideneacetone)dipalladium(0) (26.3 mg, 29.0  $\mu\text{mol}$ ) and tri(*p*-tolyl)phosphine (49.4 mg, 145  $\mu\text{mol}$ ) to yield product **12** (170 mg, 0.53 mmol, 92%) after purification by HPLC (silica gel, petroleum ether/ethyl acetate; 5:1) as a colourless oil and a mixture of diastereomers (a:b 85:15).

**Diastereomere 12(cis):**  $R_f = 0.67$  (petroleum ether/ethyl acetate 5:1);  $^1\text{H-NMR}$  ( $\text{CDCl}_3$ , 500 MHz):  $\delta$  5.65 - 5.59 (m, 1H), 5.49 - 5.44 (m, 1H), 5.37 - 5.28 (m, 1H), 4.86 - 4.75 (m, 2H), 3.77 (s, 3H), 2.96 - 2.90 (m, 2H), 2.79 - 2.69 (m, 3H), 2.63 - 2.59 (m, 1H), 2.46 - 2.38 (m, 1H), 2.15 (s, 3H), 2.10 - 2.04 (m, 1H), 1.92 - 1.88 (m, 1H), 1.25 (s, 3H), 1.12 (s, 3H) ppm;  $^{13}\text{C-NMR}$  ( $\text{CDCl}_3$ , 125 MHz):  $\delta$  211.1, 206.7, 174.0, 134.8, 129.7, 124.4, 116.1, 71.0, 58.4, 52.6, 41.5, 40.4, 39.9, 36.6, 34.0, 32.1, 31.9, 30.3, 22.9 ppm; **IR** (Film):  $\nu = 2951$  (w), 1740 (s), 1701 (m), 1684 (s), 1432 (m), 1394 (m), 1247 (s)  $\text{cm}^{-1}$ ; **MS** (ESI):  $m/z$  (%) = 441 (12), 341 (100); **HRMS**: [ $\text{C}_{19}\text{H}_{26}\text{O}_4 + \text{Na}$ ] calculated: 341.1723, found: 341.1703.  $[\alpha]_D^{20}$ : +116.1 (c = 3.53,  $\text{CHCl}_3$ )

**Diastereomere 12(trans):**  $R_f = 0.58$  (petroleum ether/ethyl acetate 5:1);  $^1\text{H-NMR}$  ( $\text{CDCl}_3$ , 500 MHz):  $\delta$  5.58 - 5.45 (m, 2H), 5.01 - 4.92 (m, 1H), 3.72 (s, 3H), 3.07 - 3.02 (m, 1H), 2.95 - 2.89 (m, 1H), 2.78 - 2.68 (m, 3H), 2.64 - 2.59 (m, 1H), 2.27 -

2.19 (m, 1H), 2.03 (s, 3H), 2.02 – 1.97 (m, 1H), 1.85 – 1.82 (m, 1H), 1.36 (s, 3H), 1.17 (s, 3H) ppm; <sup>13</sup>C-NMR (CDCl<sub>3</sub>, 125 MHz): δ 211.0, 204.5, 173.0, 135.0, 131.2, 124.9, 117.0, 72.8, 58.2, 52.6, 41.6, 41.3, 39.2, 37.9, 34.7, 31.6, 30.0, 29.7, 26.1 ppm; IR (Film): ν = 2951 (w), 1740 (s), 1700 (m), 1682 (s), 1432 (m), 1394 (m), 1215 (s) cm<sup>-1</sup>; MS (ESI): m/z (%) = 441 (10), 341 (100); HRMS: [C<sub>19</sub>H<sub>26</sub>O<sub>4</sub> + Na] calculated: 341.1723, found: 341.1703. [α]<sub>D</sub><sup>20</sup>: -53.5 (c = 3.53, CHCl<sub>3</sub>)

#### Preparation of compound 14:

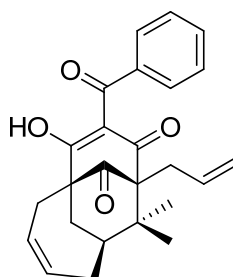

14

Substrate **12** (69.1 mg, 0.24 mmol, 1 eq.) was dissolved in THF (7 mL) and cooled to 0 °C. potassium *tert*-butanolate (53 mg, 0.48 mmol, 2 eq.) was added. The reaction mixture was stirred for 30 min at 0 °C. Benzoyl cyanide (104 mg, 0.79 mmol, 3.3 eq.) was added portionwise and the mixture was stirred at 40 °C for 24h. The solution was quenched with sat. NH<sub>4</sub>Cl-solution (10 mL) and extracted with ethyl acetate (3 x 20 mL). The combined organic layers were washed with NaHCO<sub>3</sub> (10 mL), brine, dried over Na<sub>2</sub>SO<sub>4</sub>, filtered and concentrated in vacuo. The crude product was purified via column chromatography (silica gel, petroleum ether/ethyl acetate; 2:1) to yield **14** as a white solid (85.8 mg, 0.21 mmol, 91%).

R<sub>f</sub> = 0.48 (petroleum ether/ethyl acetate 2:1); <sup>1</sup>H-NMR (CDCl<sub>3</sub>, 500 MHz, 5.5:1 mixture of enol tautomers as determined by H<sup>1</sup> NMR analysis): δ 18.1 (s, 1H), 17.70 (s, 0.2H), 8.17 – 8.15 (m, 1H), 7.80 – 7.77 (m, 0.6H), 7.63 – 7.59 (m, 1H), 7.55 – 7.49 (m, 1.8H), 7.45 – 7.37 (m, 4.7H), 5.72 – 5.51 (m, 3.6 H), 5.16 – 4.96 (m, 2.4 H), 2.92 – 2.82 (m, 2.3H), 2.77 – 2.73 (m, 1.3 H), 2.66 – 2.56 (m, 2H), 2.53 – 2.41 (m 1.2H), 2.09 – 1.94 (m, 4H), 1.40 (s, 3H), 1.18 (s, 0.7H), 1.10 (s, 3H), 0.98 (s, 0.7H) ppm; <sup>13</sup>C-NMR (CDCl<sub>3</sub>, 125 MHz, 5.5:1 mixture of enol tautomers as determined by H<sup>1</sup> NMR analysis): δ 207.7, 200.2, 195.8, 190.1, 167.9, 136.8, 136.3, 133.9, 133.3, 133.0, 132.1, 131.7, 130.5, 129.5, 128.3, 128.2, 127.7, 127.5, 127.4, 127.0, 126.0, 125.4, 119.5, 119.3, 111.4, 65.0, 62.8, 47.8, 47.6, 44.7, 43.8, 39.8, 37.8, 34.7, 33.8,

29.0, 28.2, 26.5, 26.0, 25.9, 23.9, 23.7 ppm; **IR** (Film):  $\nu = 3017$  (w), 2984 (w), 1730 (m), 1680 (s), 1528 (m), 1394 (m)  $\text{cm}^{-1}$ ; **MS** (ESI):  $m/z$  (%) = 435 (25), 413 (100), 391 (8), 301 (3); **HRMS**:  $[\text{C}_{25}\text{H}_{26}\text{O}_4 + \text{Na}]$  calculated: 413.1723, found: 413.1724.  $[\alpha]_{\text{D}}^{20}$ : -77.9 ( $c = 3.53$ ,  $\text{CHCl}_3$ )

### Preparation of (+)-Clusianone:

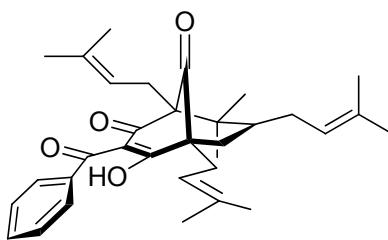

1

Substrate **14** (9 mg, 0.02 mmol, 1 eq.), amylene (0.2 mL, 2.3 mmol, 100 eq.) and Grubb's II (0.002 mmol, 10 mol%) were dissolved in DCM (0.2 mL) and heated to reflux for 2h. The solvent was removed in vacuo and the crude product filtered over silica (petroleum ether/ethyl acetate; 5:1). The crude product was purified via HPLC (silica gel, petroleum ether/ethyl acetate; 5:1) to yield (+)-clusianone **7** (6.5 mg, 0.013 mmol, 65%). Spectroscopic data were identical to those described in the literature.<sup>[4]</sup>

$R_f = 0.54$  (petroleum ether/ethyl acetate 5:1);  **$^1\text{H-NMR}$**  ( $\text{CDCl}_3$ , 500 MHz, 5.5:1 mixture of enol tautomers as determined by  $\text{H}^1$  NMR analysis):  $\delta$  17.56 (s, 0.9H), 17.50 (s, 0.6H), 7.57 – 7.49 (m, 5H), 7.39 – 7.34 (m, 3.3H), 5.20 – 5.11 (m, 1.6H), 5.05 – 5.01 (m, 0.6H), 4.98 – 4.94 (m, 0.7H), 4.92 – 4.88 (m, 1H), 4.84 – 4.79 (m, 1H), 2.75 – 2.71 (m, 2.5H), 2.66 – 2.61 (m, 1.1H), 2.57 – 2.52 (m, 1H), 2.49 – 2.38 (m, 1.7H), 2.16 – 2.05 (m, 2.4H), 2.03 – 1.98 (m, 1H), 1.78 (s, 2H), 1.76 (s, 2H), 1.72 – 1.68 (m, 8H), 1.66 (s, 2H), 1.64 (s, 3H), 1.62 (s, 3H), 1.61 (s, 2H), 1.59 – 1.56 (m, 1H), 1.54 (s, 3H), 1.53 (s, 3H), 1.51 (s, 3H), 1.41 – 1.35 (m, 1H), 1.23 (s, 3H), 1.05 (s, 2H), 0.83 (s, 3H), 0.73 (s, 2H) ppm;  **$^{13}\text{C-NMR}$**  ( $\text{CDCl}_3$ , 125 MHz, 5.5:1 mixture of enol tautomers as determined by  $\text{H}^1$  NMR analysis):  $\delta$  207.5, 207.3, 197.8, 197.5, 195.4, 194.7, 193.9, 192.6, 137.2, 134.6, 134.5, 133.3, 132.5, 132.5, 128.9, 128.9, 127.8, 127.7, 122.3, 122.2, 120.3, 119.9, 119.1, 119.0, 116.8, 116.1, 71.0, 67.2, 64.6, 59.6, 48.5, 47.6, 42.9, 42.3, 41.5, 30.6, 29.8, 29.7, 28.5, 28.1, 26.1, 26.1, 26.0, 25.8, 25.7, 25.5, 24.9, 23.7, 22.6, 18.2, 18.1, 18.1, 18.0, 17.9, 16.4, 16.2 ppm; **IR** (Film):  $\nu = 2974$  (w), 2913 (w), 1727 (m), 1665 (m), 1543 (m), 1375 (m), 908 (m), 729 (s), 691

(m)  $\text{cm}^{-1}$ ; **MS** (ESI):  $m/z$  (%) = 547 (32), 525 (100), 511 (51); **HRMS**:  $[\text{C}_{33}\text{H}_{42}\text{O}_4 + \text{Na}]$   
calculated: 525.2975, found: 525.2968.  $[\alpha]_{\text{D}}^{20}$ : +30.6 (c = 3.53,  $\text{CHCl}_3$ )

Chiracel AD-H, 0.5ml/min, 90:10, 1µl

=====  
 Injection Date : 04.04.14 15:42:13  
 Sample Name : FH6-051  
 Acq. Operator : Fiene  
 Method : C:\HPCHEM\2\METHODS\BP98\_2.M  
 Last changed : 04.04.14 14:27:20 by Isabel  
 (modified after loading)

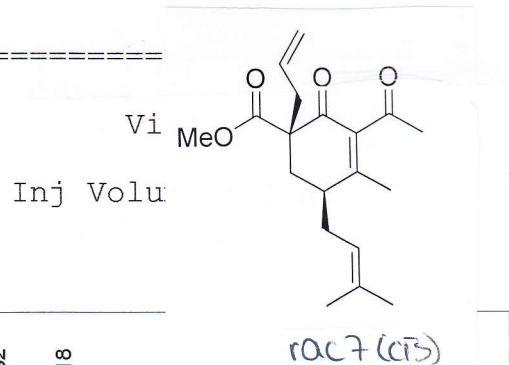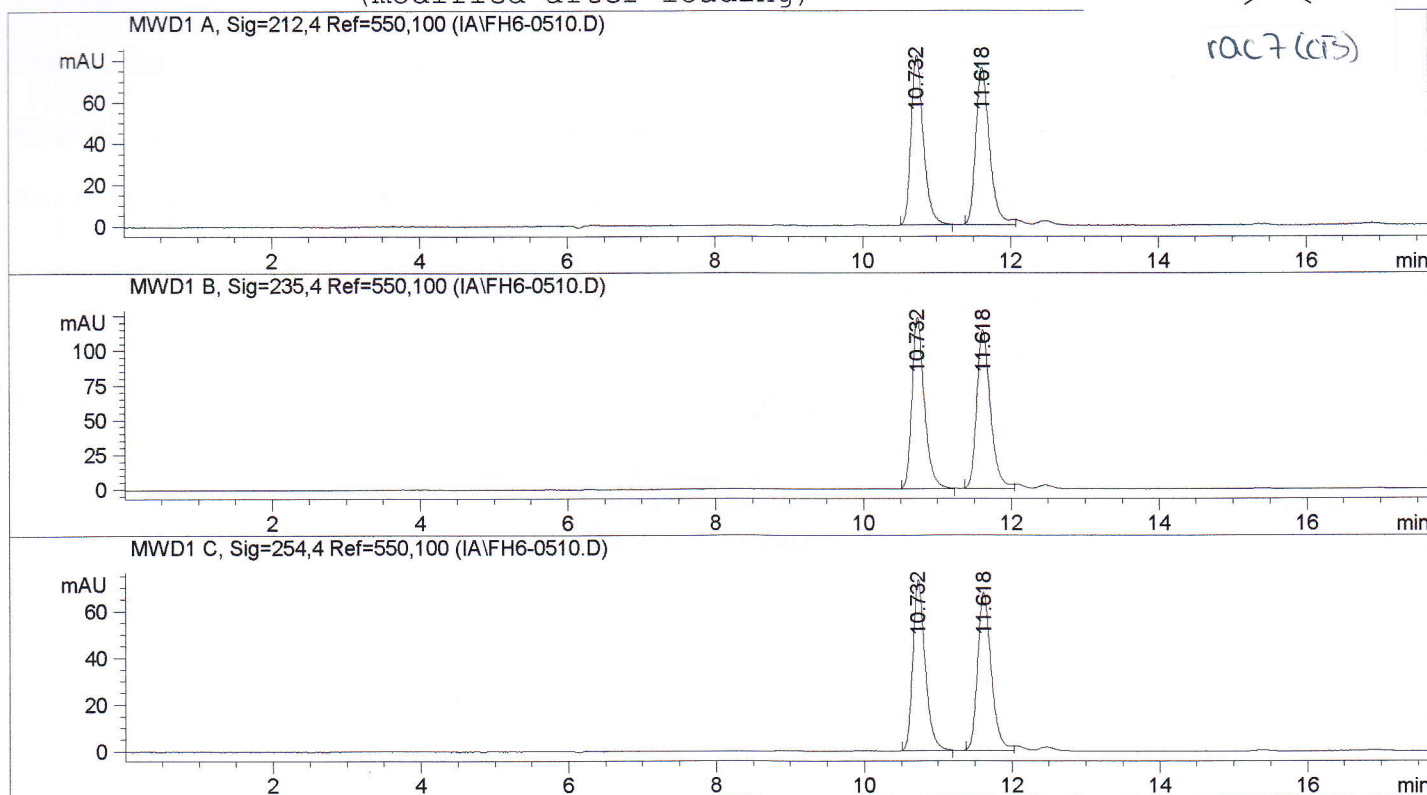

=====  
 Area Percent Report  
 =====

rac cis!!

Sorted By : Signal  
 Multiplier : 1.0000  
 Dilution : 1.0000  
 Sample Amount : 1.00000 [ng/ul] (not used in calc.)

Signal 1: MWD1 A, Sig=212,4 Ref=550,100

| Peak # | RetTime [min] | Type | Width [min] | Area [mAU*s] | Height [mAU] | Area %  |
|--------|---------------|------|-------------|--------------|--------------|---------|
| 1      | 10.732        | BB   | 0.1817      | 967.29578    | 81.96939     | 49.2792 |
| 2      | 11.618        | BB   | 0.1997      | 995.59174    | 76.54868     | 50.7208 |

Totals : 1962.88751 158.51807

Results obtained with enhanced integrator!



Chiracel AD-H, 0.5ml/min, 90:10, 1µl

=====  
 Injection Date : 16.05.14 17:15:10  
 Sample Name : FH6-099cis  
 Acq. Operator : Fiene  
 Method : C:\HPCHEM\2\METHODS\BP98\_2.M  
 Last changed : 16.05.14 17:13:09 by Fiene  
 (modified after loading)

Vi.  
 Inj Volu

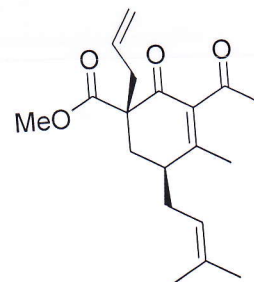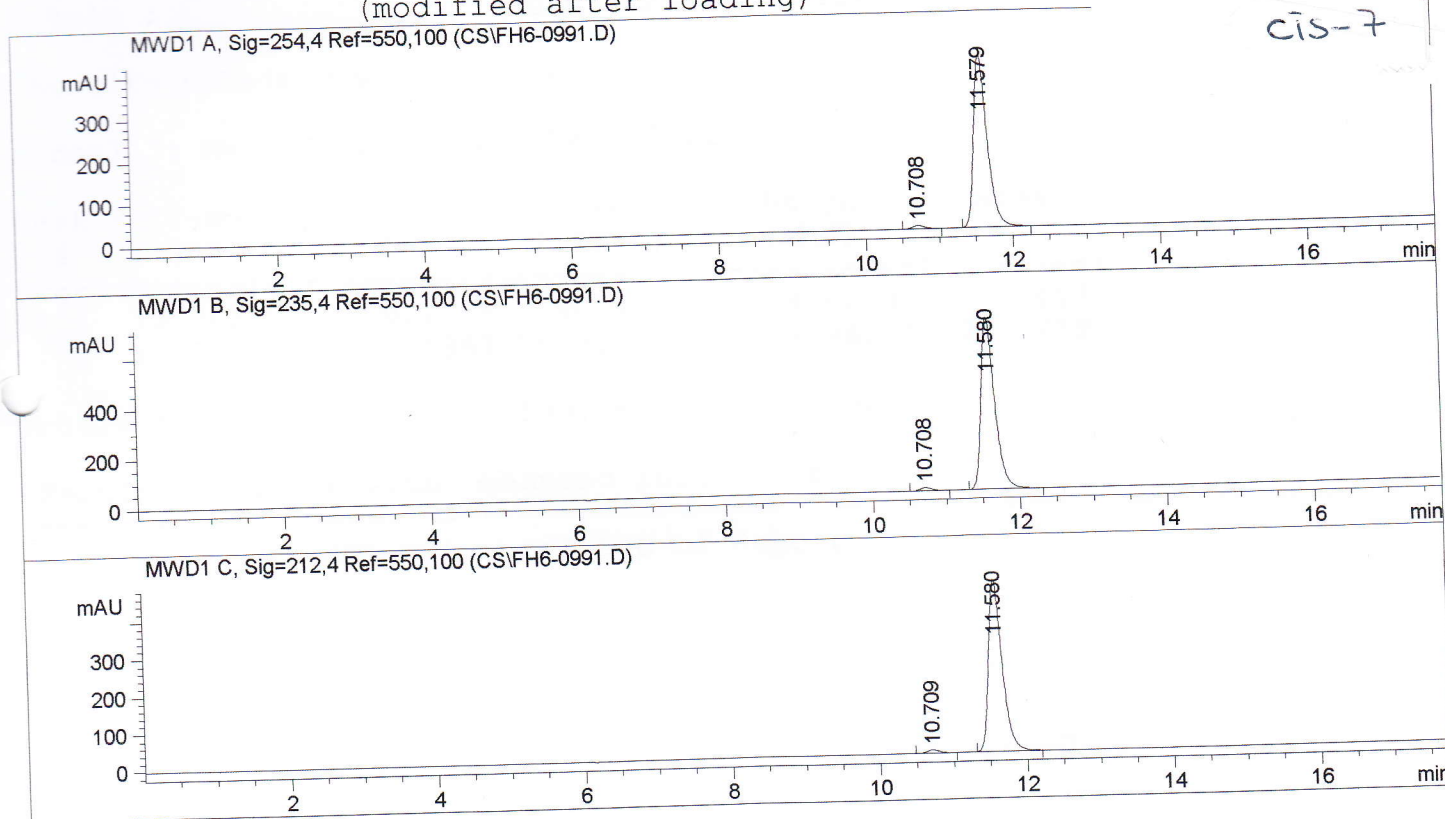

=====  
 Area Percent Report  
 =====

Sorted By : Signal  
 Multiplier : 1.0000  
 Dilution : 1.0000  
 Sample Amount : 1.00000 [ng/ul] (not used in calc.)

96,52%

Signal 1: MWD1 A, Sig=254,4 Ref=550,100

| Peak # | RetTime [min] | Type | Width [min] | Area [mAU*s] | Height [mAU] | Area %  |
|--------|---------------|------|-------------|--------------|--------------|---------|
| 1      | 10.708        | PB   | 0.1765      | 92.72221     | 7.92688      | 1.7400  |
| 2      | 11.579        | BB   | 0.1965      | 5236.20947   | 405.85696    | 98.2600 |

Totals : 5328.93168 413.78384

Results obtained with enhanced integrator!

Chiracel AD-H, 0.5ml/min, 90:10, 1µl

=====  
 Injection Date : 28.04.14 14:00:50  
 Sample Name : FH6-073trans  
 Acq. Operator : Fiene  
 Method : C:\HPCHEM\2\METHODS\BP98\_2.M  
 Last changed : 28.04.14 12:54:51 by Fiene  
 (modified after loading)

Inj Vc

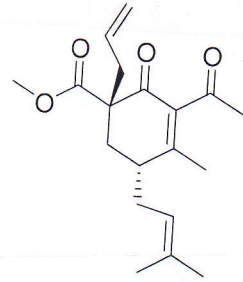

rac-7(trans)

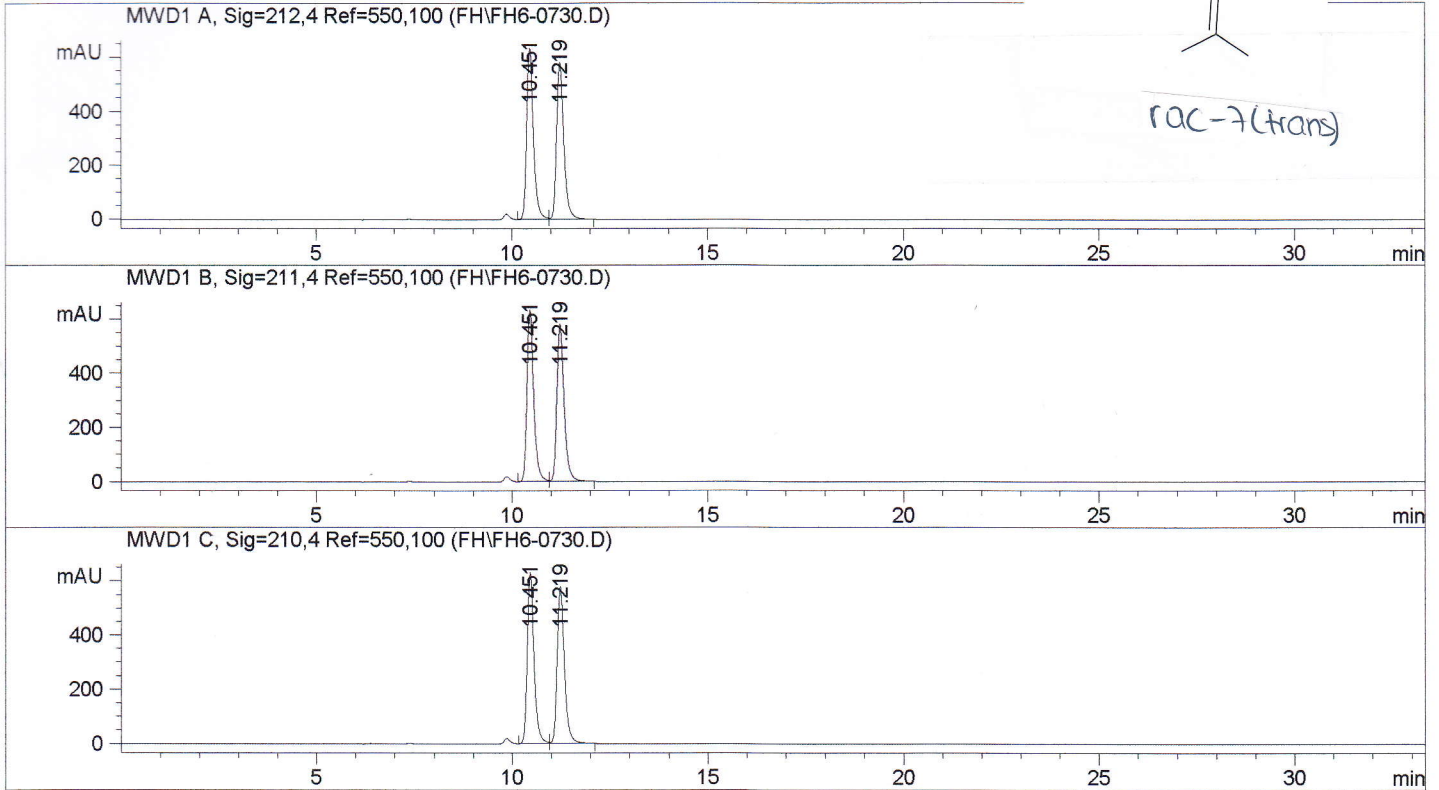

=====  
 Area Percent Report  
 =====

Sorted By : Signal  
 Multiplier : 1.0000  
 Dilution : 1.0000  
 Sample Amount : 1.00000 [ng/ul] (not used in calc.)

rac

Signal 1: MWD1 A, Sig=212,4 Ref=550,100

| Peak # | RetTime [min] | Type | Width [min] | Area [mAU*s] | Height [mAU] | Area %  |
|--------|---------------|------|-------------|--------------|--------------|---------|
| 1      | 10.451        | VV   | 0.1815      | 7574.48096   | 633.62378    | 50.3046 |
| 2      | 11.219        | VB   | 0.1941      | 7482.74707   | 581.43042    | 49.6954 |

Totals : 1.50572e4 1215.05420

Results obtained with enhanced integrator!

Chiracel AD-H, 0.5ml/min, 90:10, 1µl

Injection Date : 16.05.14 17:01:  
 Sample Name : FH6-099trans  
 Acq. Operator : Fiene  
 Method : C:\HPCHEM\2\ME  
 Last changed : 16.05.14 17:13:  
 (modified after)

Vial : 10  
 Volume : 5 µl

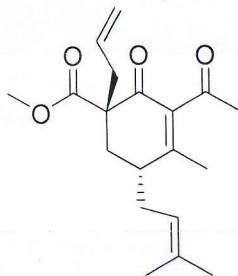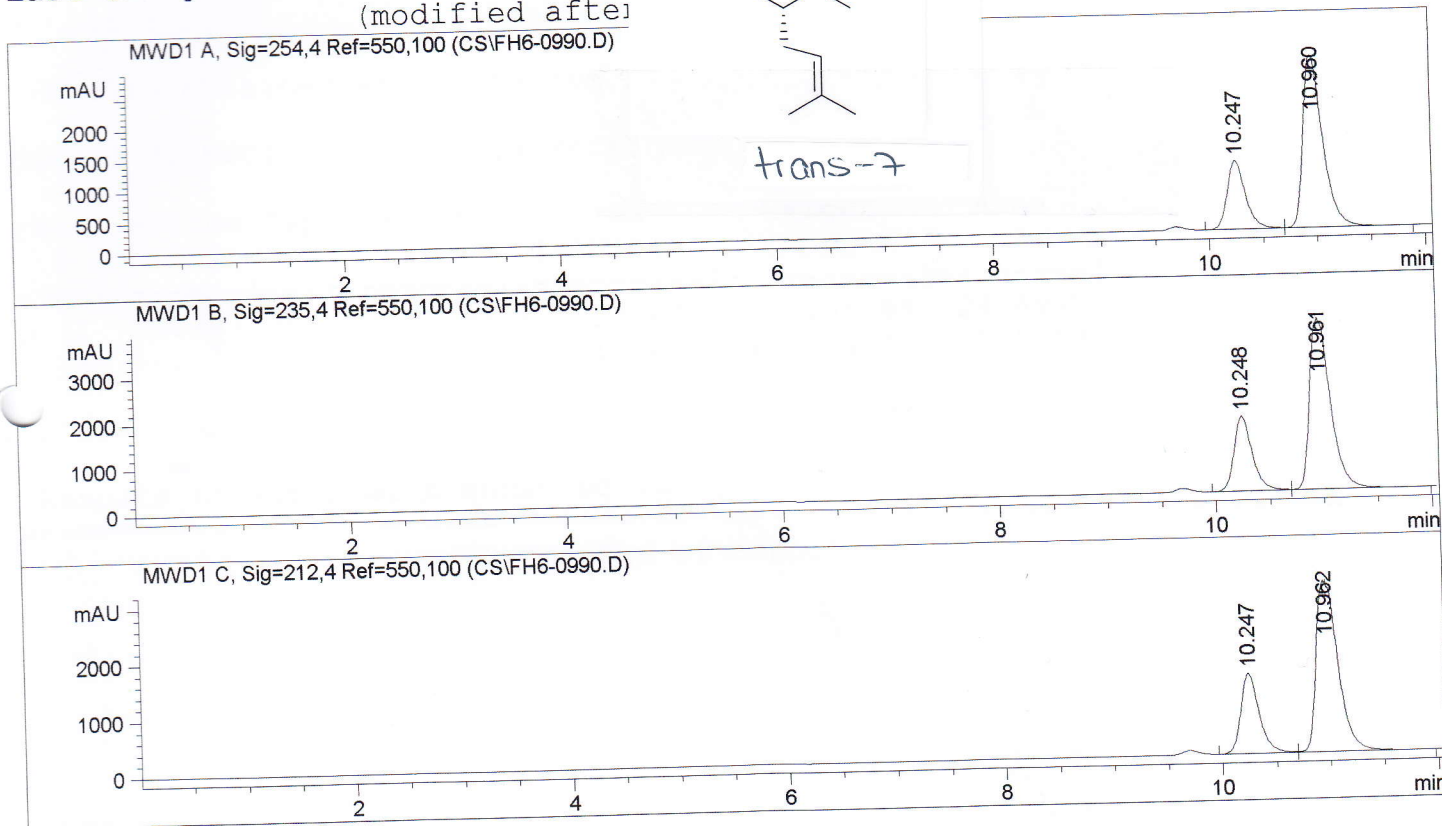

Area Percent Report

Sorted By : Signal  
 Multiplier : 1.0000  
 Dilution : 1.0000  
 Sample Amount : 1.00000 [ng/ul] (not used in calc.)

461.

Signal 1: MWD1 A, Sig=254,4 Ref=550,100

| Peak # | RetTime [min] | Type | Width [min] | Area [mAU*s] | Height [mAU] | Area %  |
|--------|---------------|------|-------------|--------------|--------------|---------|
| 1      | 10.247        | VV   | 0.1790      | 1.30550e4    | 1111.77527   | 27.1166 |
| 2      | 10.960        | VB   | 0.1935      | 3.50889e4    | 2775.43188   | 72.8834 |

Totals : 4.81439e4 3887.20715

Results obtained with enhanced integrator!

### Part III – NMR Spectra

Supplementary Figure 1.  $^1\text{H}$  NMR spectrum of synthetic **6**  $\text{CDCl}_3$  (500 MHz):

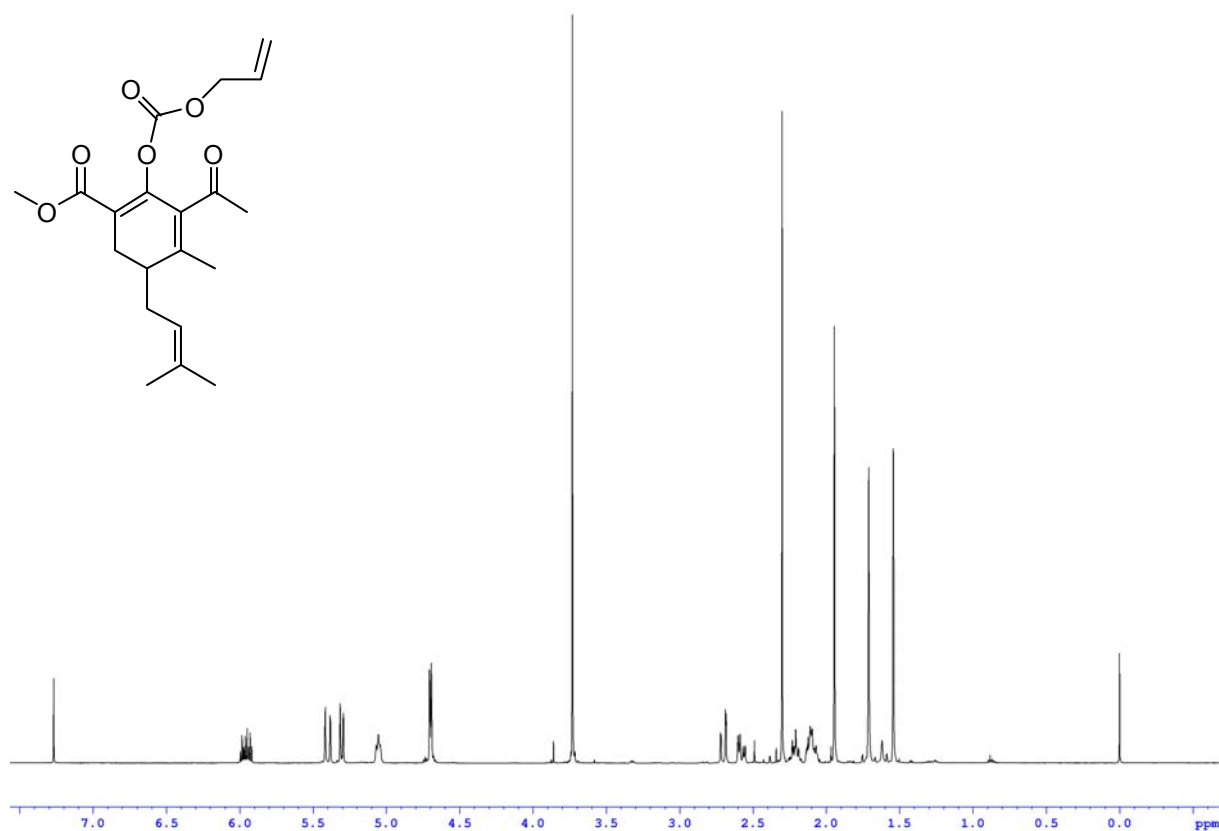

Supplementary Figure 2.  $^1\text{H}$  NMR spectrum of synthetic **cis-7**  $\text{CDCl}_3$  (500 MHz):

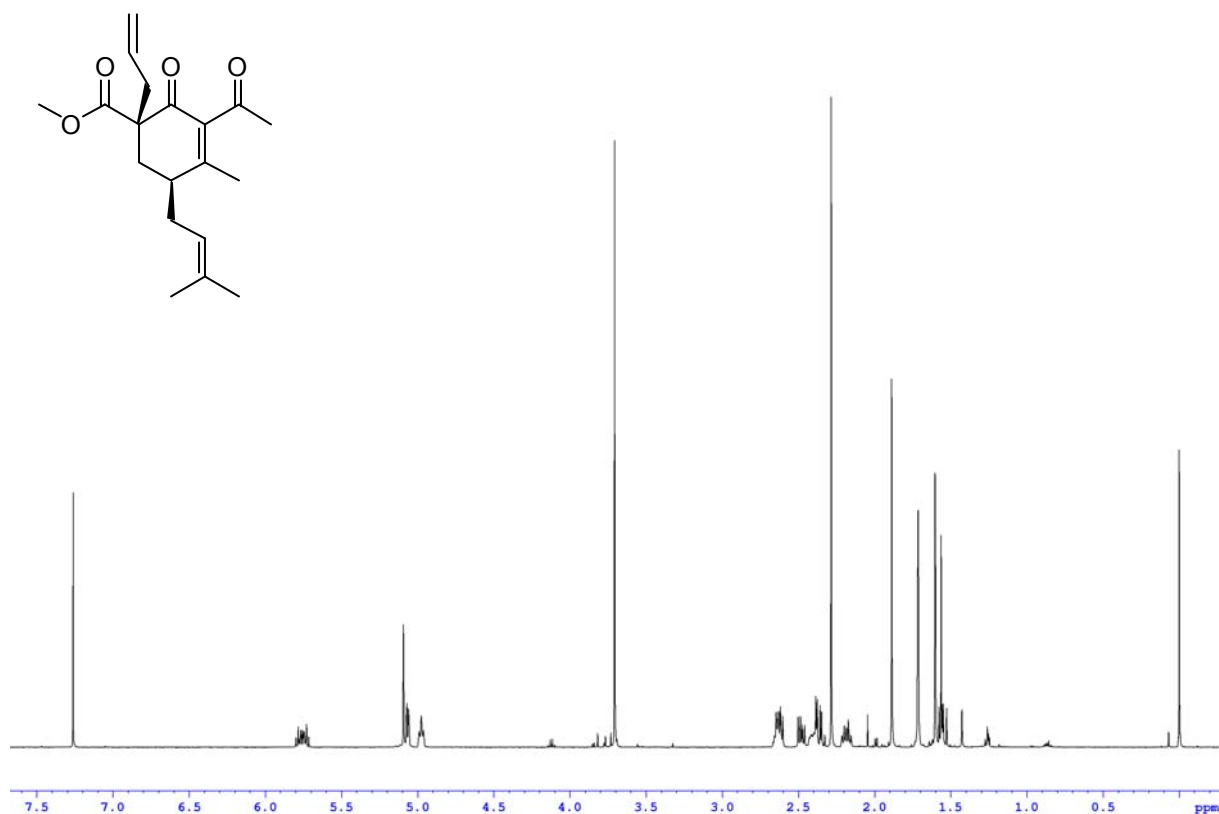

Supplementary Figure 3.  $^1\text{H}$  NMR spectrum of synthetic **trans-7**  $\text{CDCl}_3$  (500 MHz):

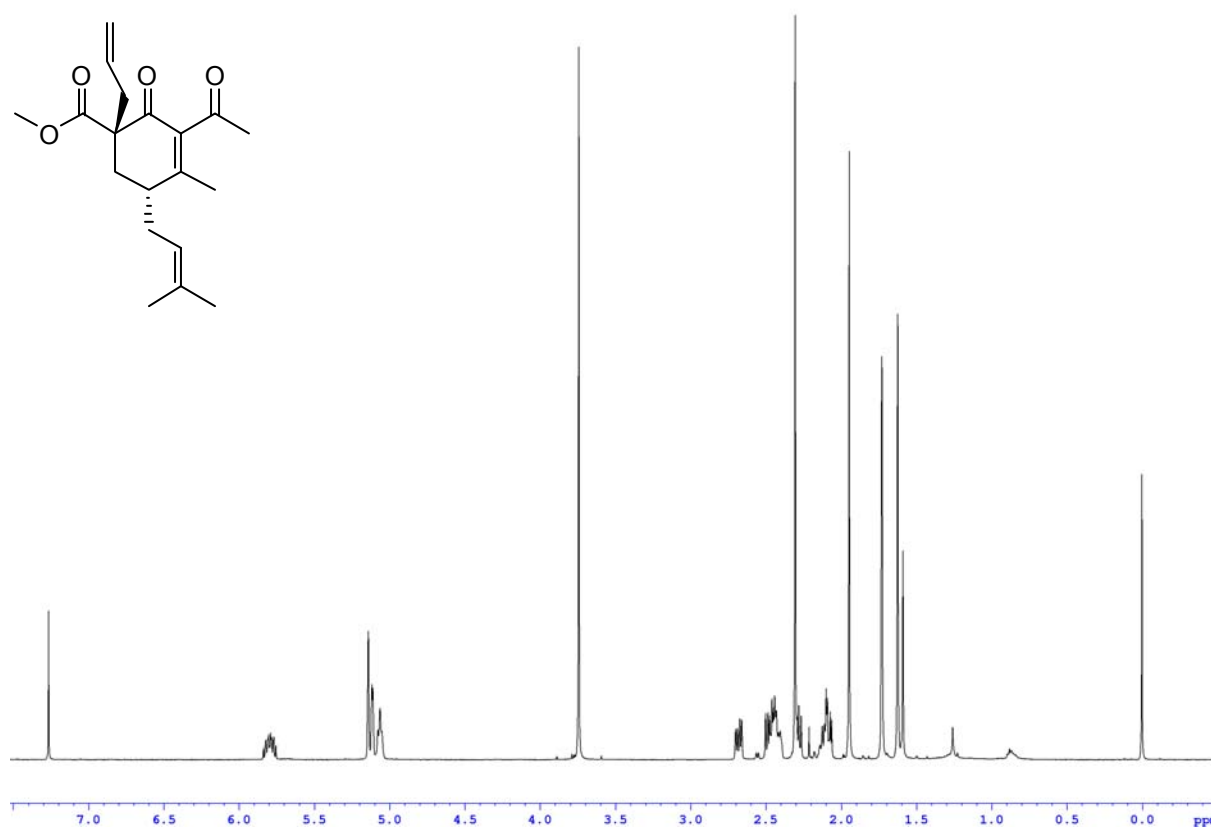

Supplementary Figure 4.  $^1\text{H}$  NMR spectrum of synthetic precursor to **8**  $\text{CDCl}_3$  (500 MHz):

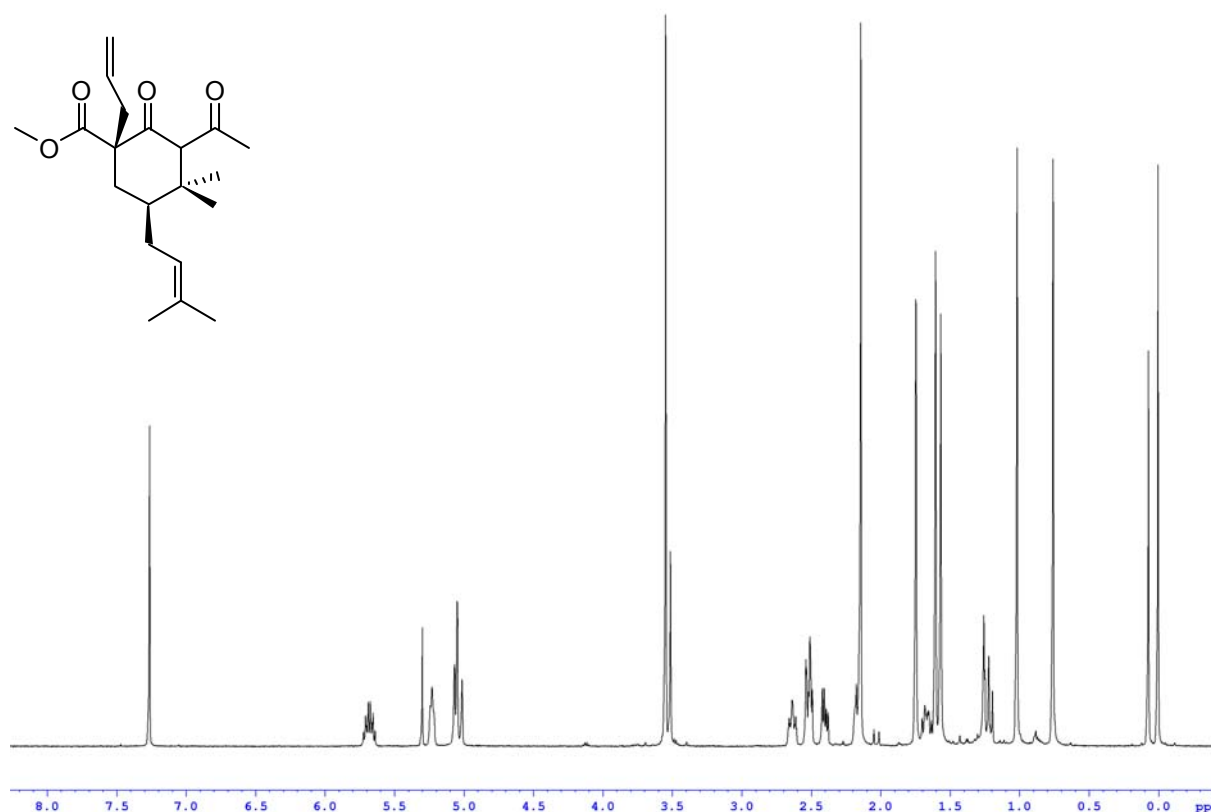

Supplementary Figure 5.  $^1\text{H}$  NMR spectrum of synthetic **9**  $\text{CDCl}_3$  (500 MHz):

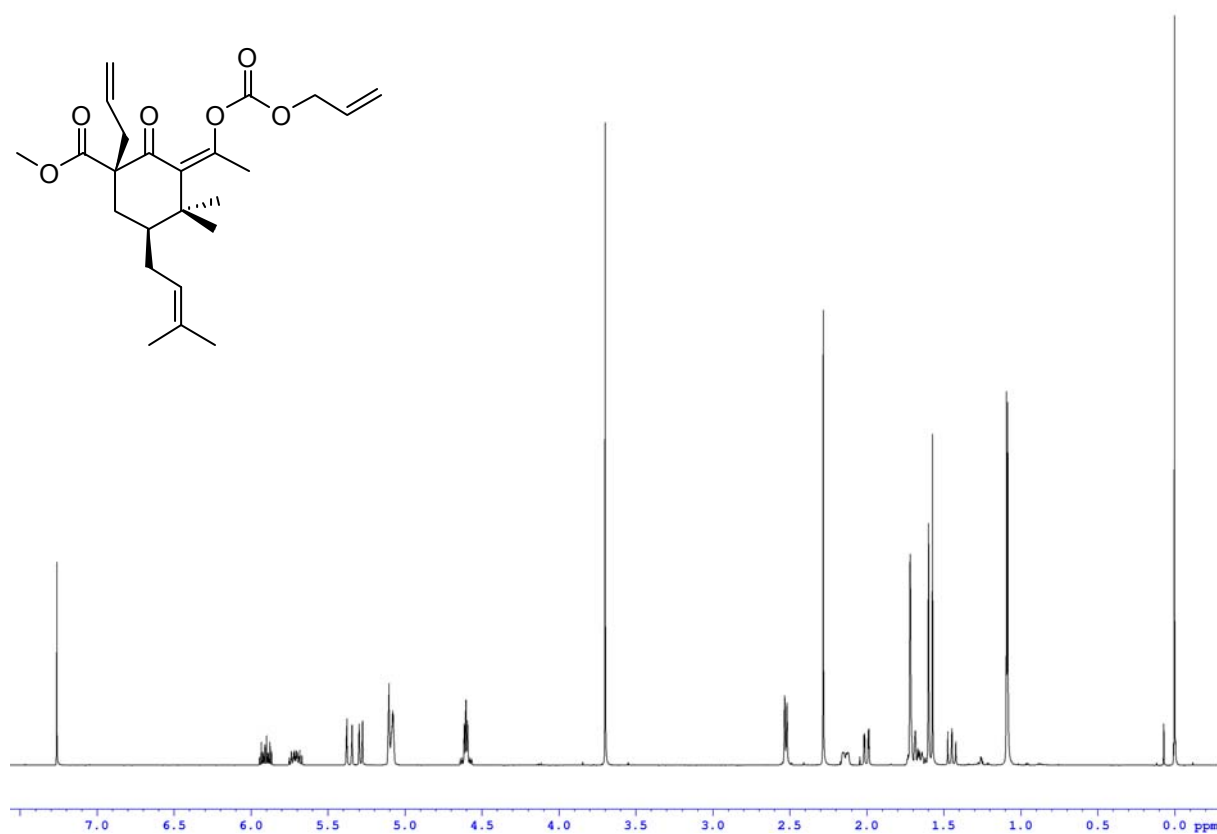

Supplementary Figure 6.  $^1\text{H}$  NMR spectrum of synthetic **10**  $\text{CDCl}_3$  (500 MHz):

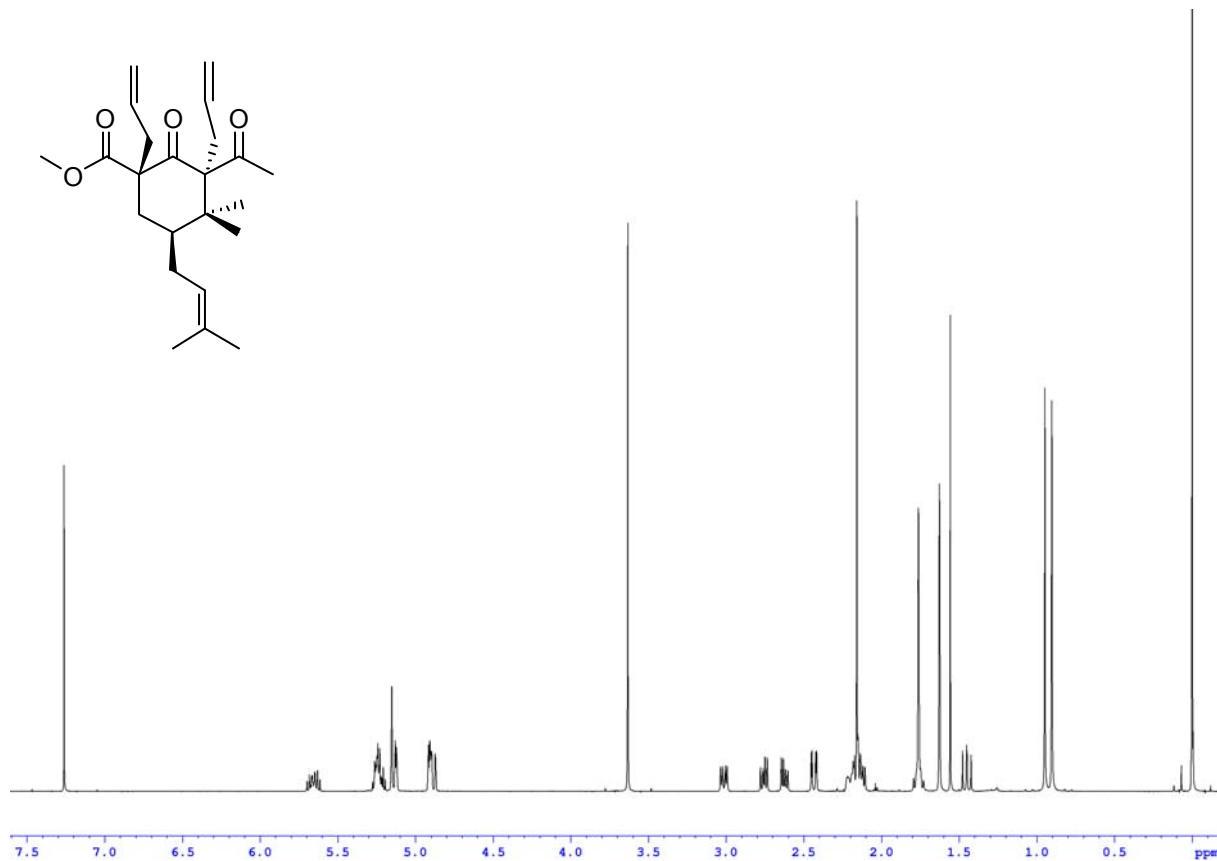

Supplementary Figure 7.  $^1\text{H}$  NMR spectrum of synthetic **13**  $\text{CDCl}_3$  (500 MHz):

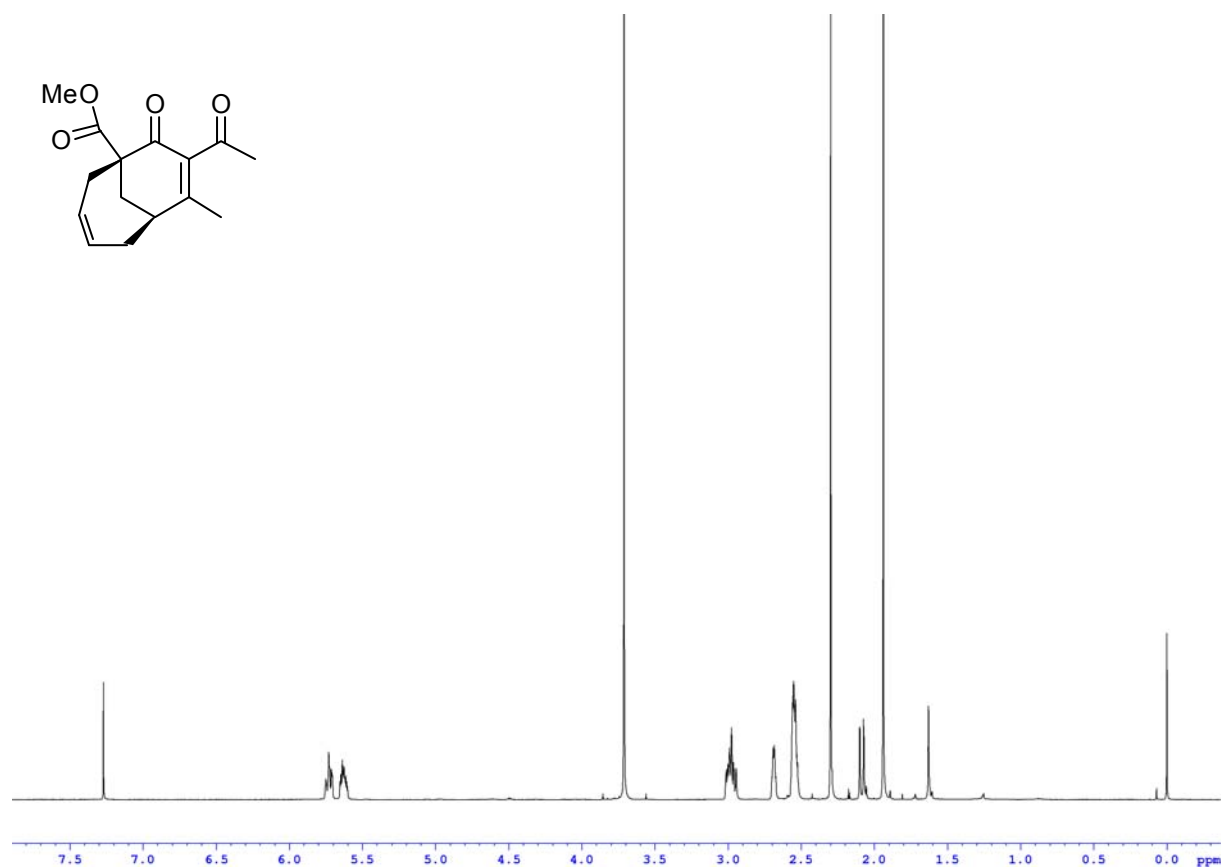

Supplementary Figure 8.  $^1\text{H}$  NMR spectrum of synthetic **precursor to 11**  $\text{CDCl}_3$  (500 MHz):

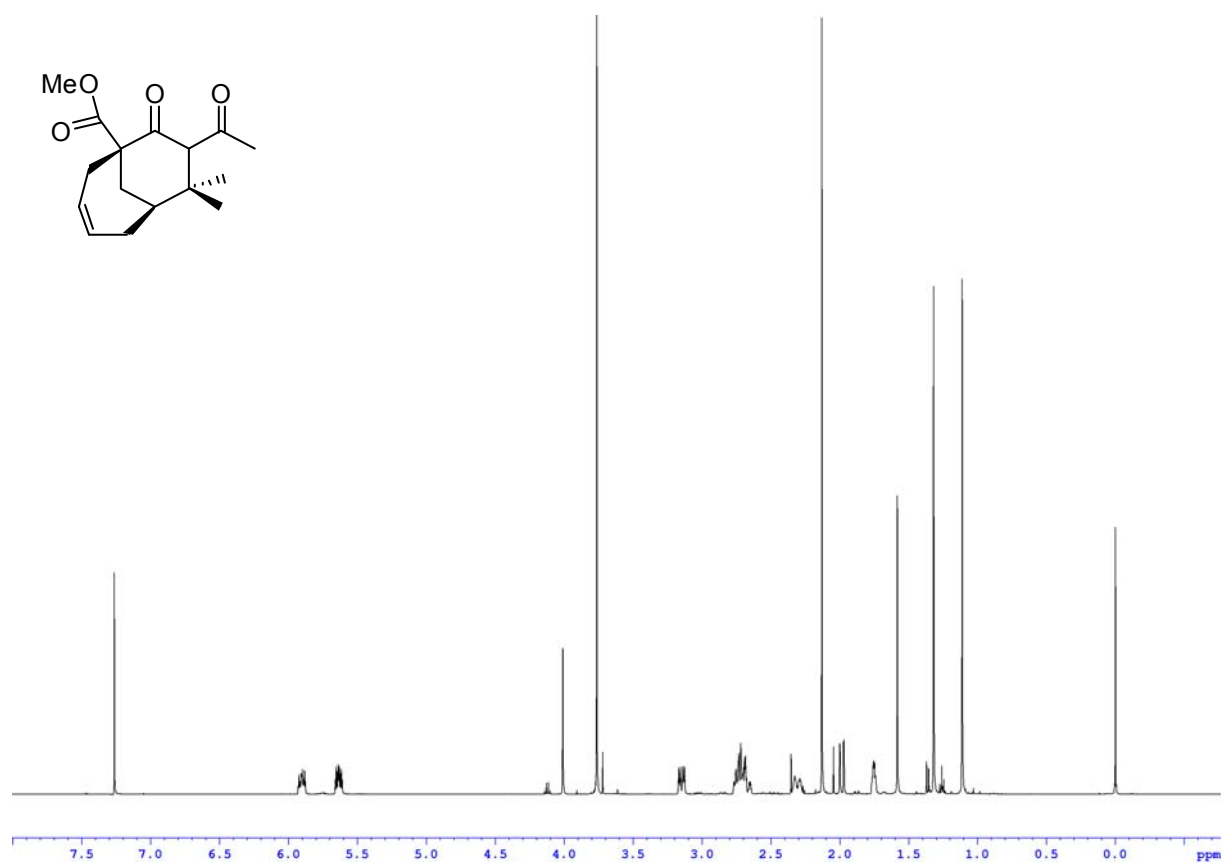

Supplementary Figure 9.  $^1\text{H}$  NMR spectrum of synthetic **11a**  $\text{CDCl}_3$  (500 MHz):

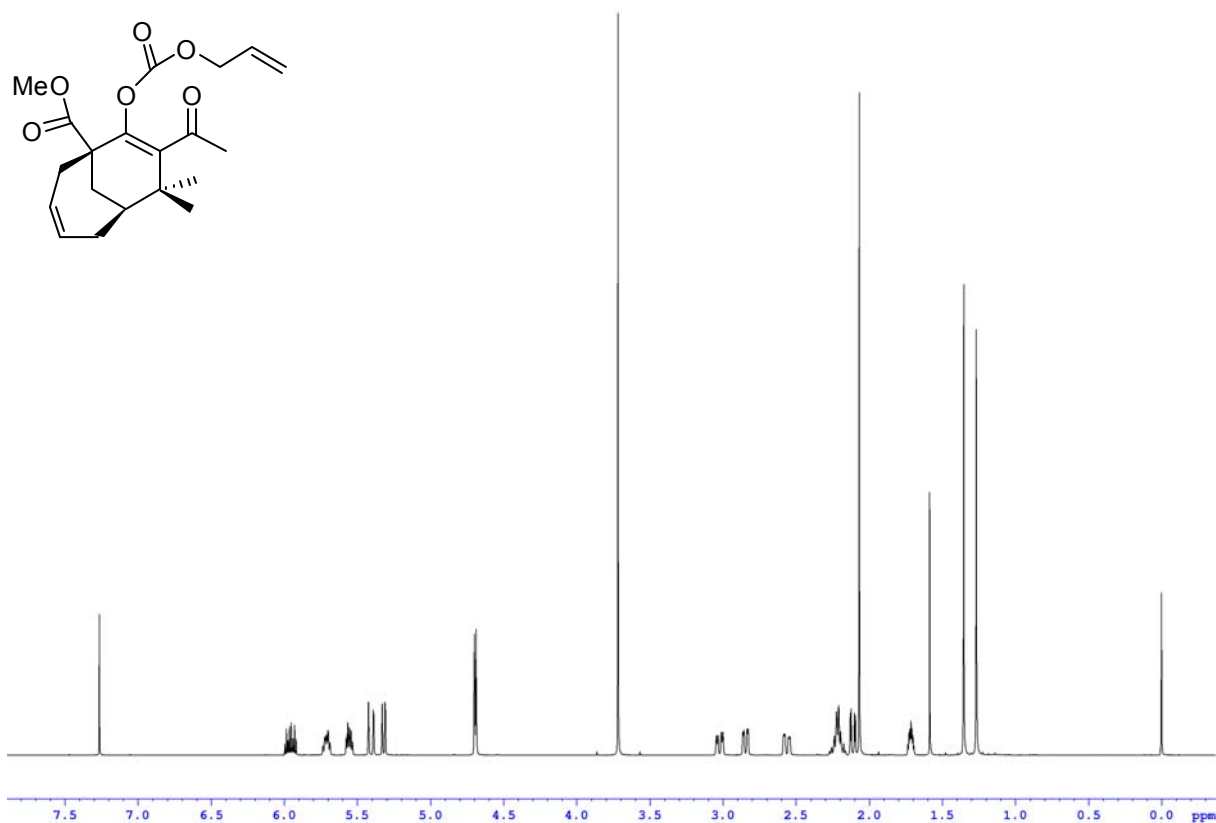

Supplementary Figure 10.  $^1\text{H}$  NMR spectrum of synthetic **11b**  $\text{CDCl}_3$  (500 MHz):

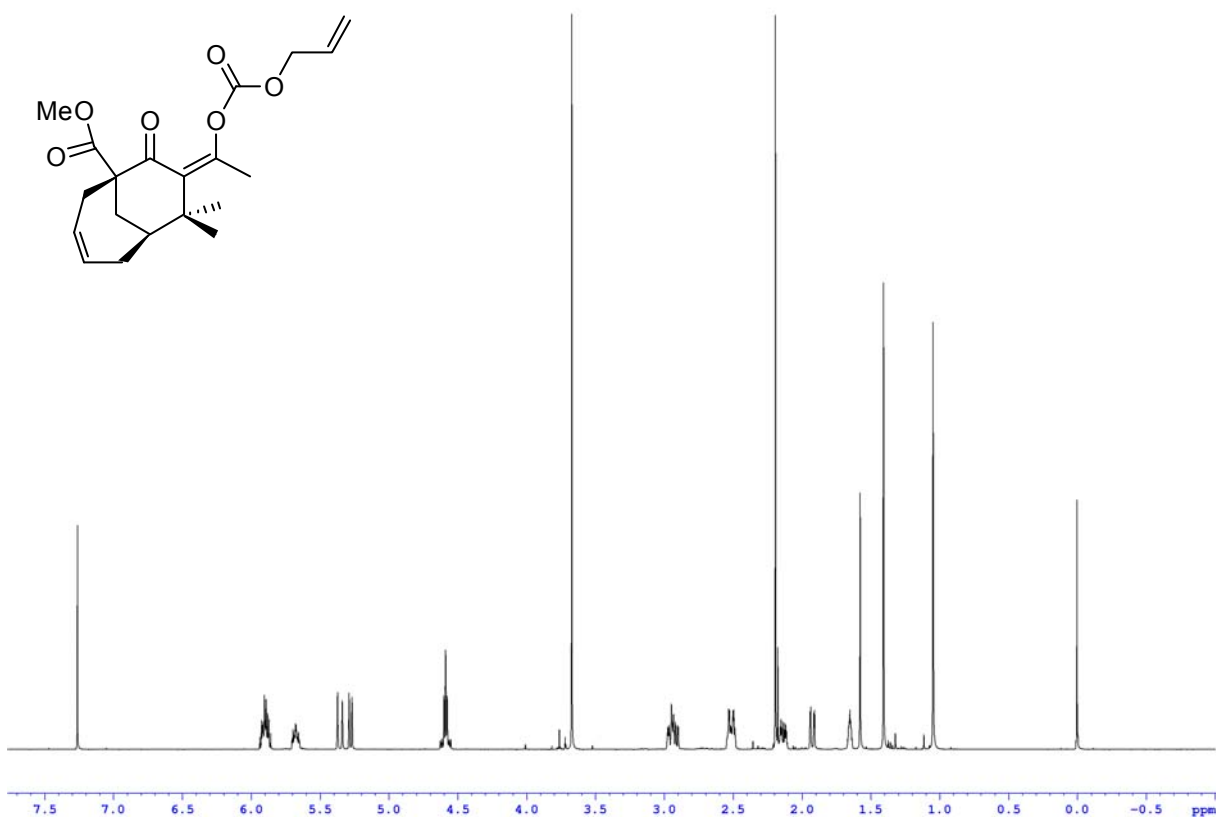



Supplementary Figure 11.  $^1\text{H}$  NMR spectrum of synthetic **12(cis)**  $\text{CDCl}_3$  (500 MHz):

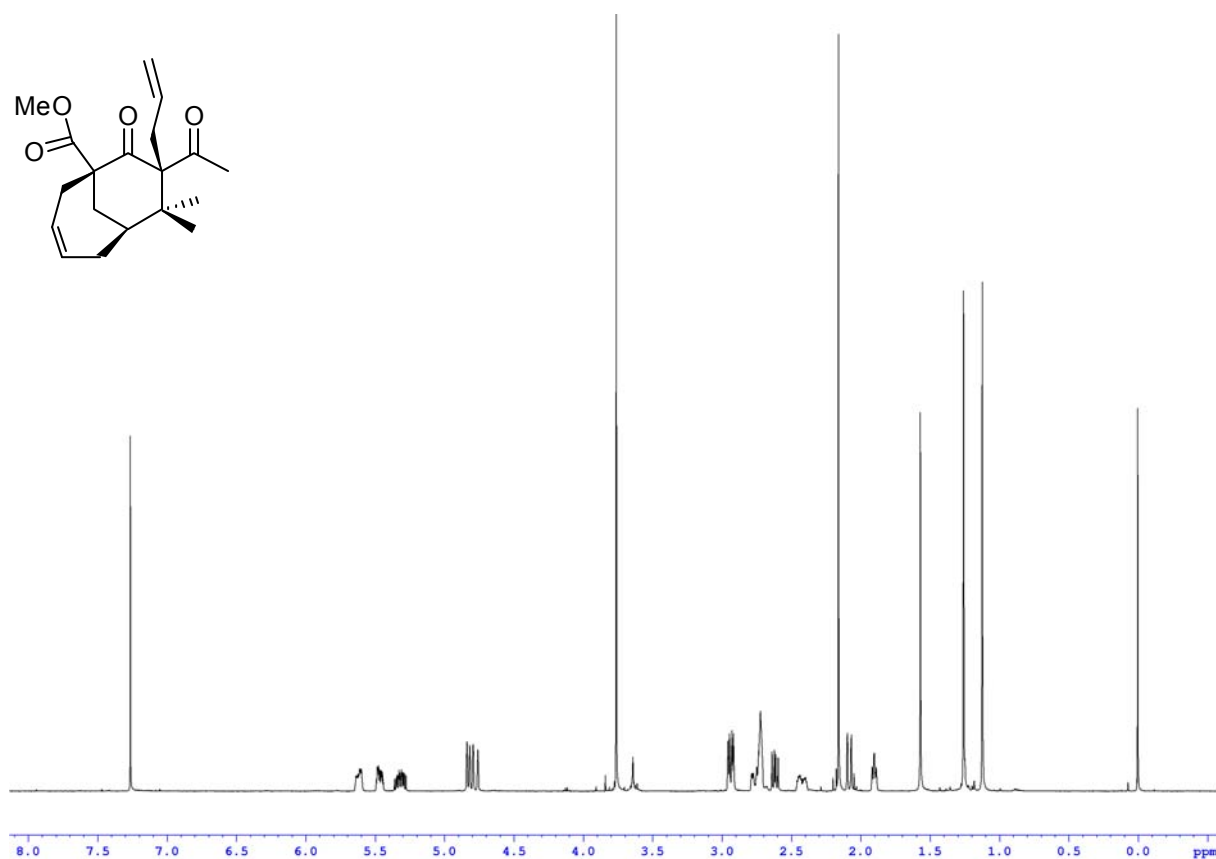

Supplementary Figure 12.  $^1\text{H}$  NMR spectrum of synthetic **12(trans)**  $\text{CDCl}_3$  (500 MHz):

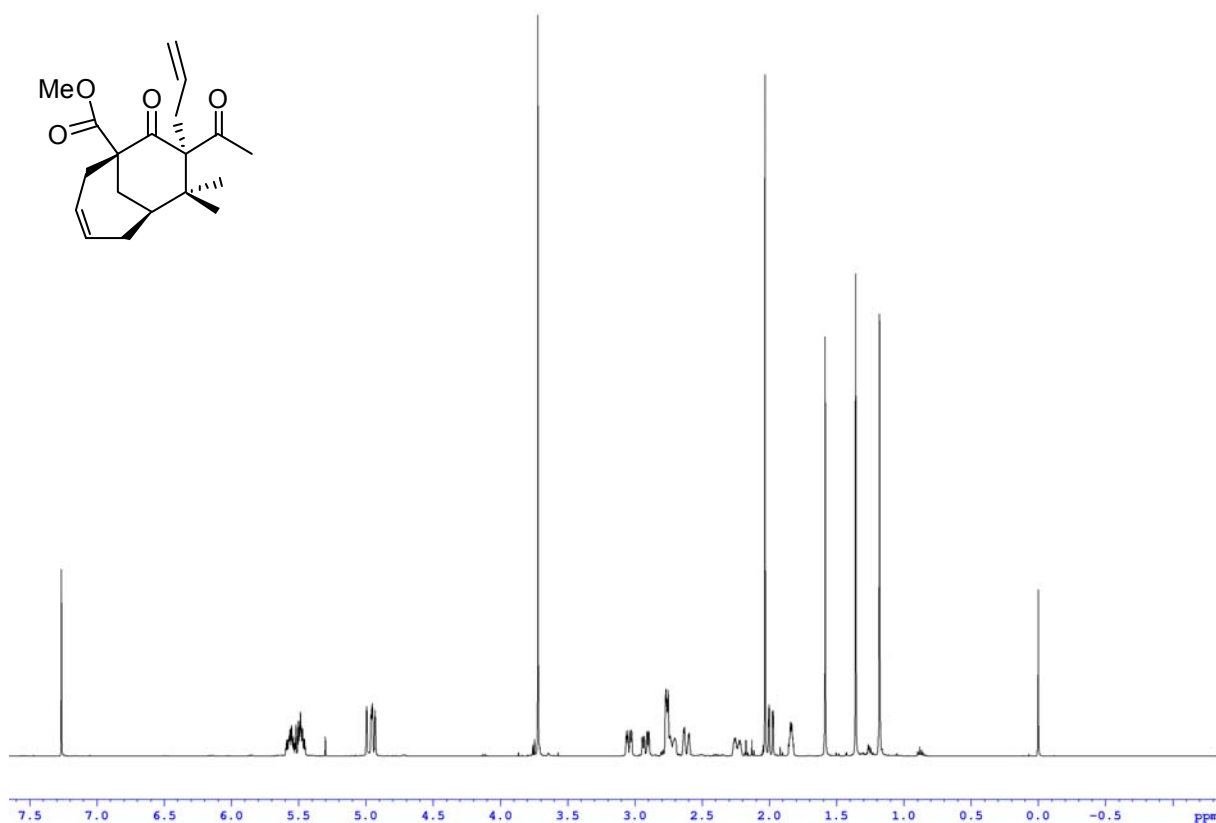

Supplementary Figure 13.  $^1\text{H}$  NMR spectrum of synthetic **14**  $\text{CDCl}_3$  (500 MHz):

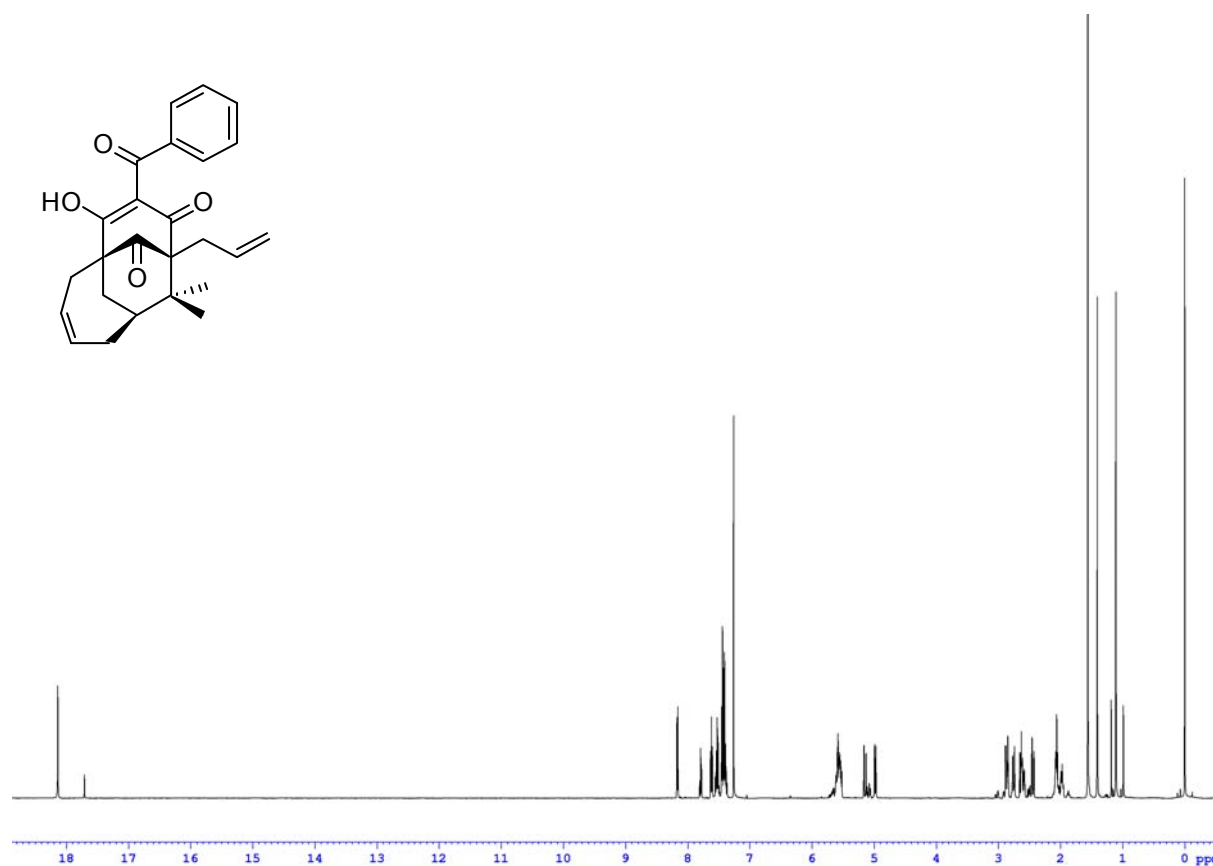

Supplementary Figure 14.  $^1\text{H}$  NMR spectrum of synthetic (+)-clusianone **1**  $\text{CDCl}_3$  (500 MHz):

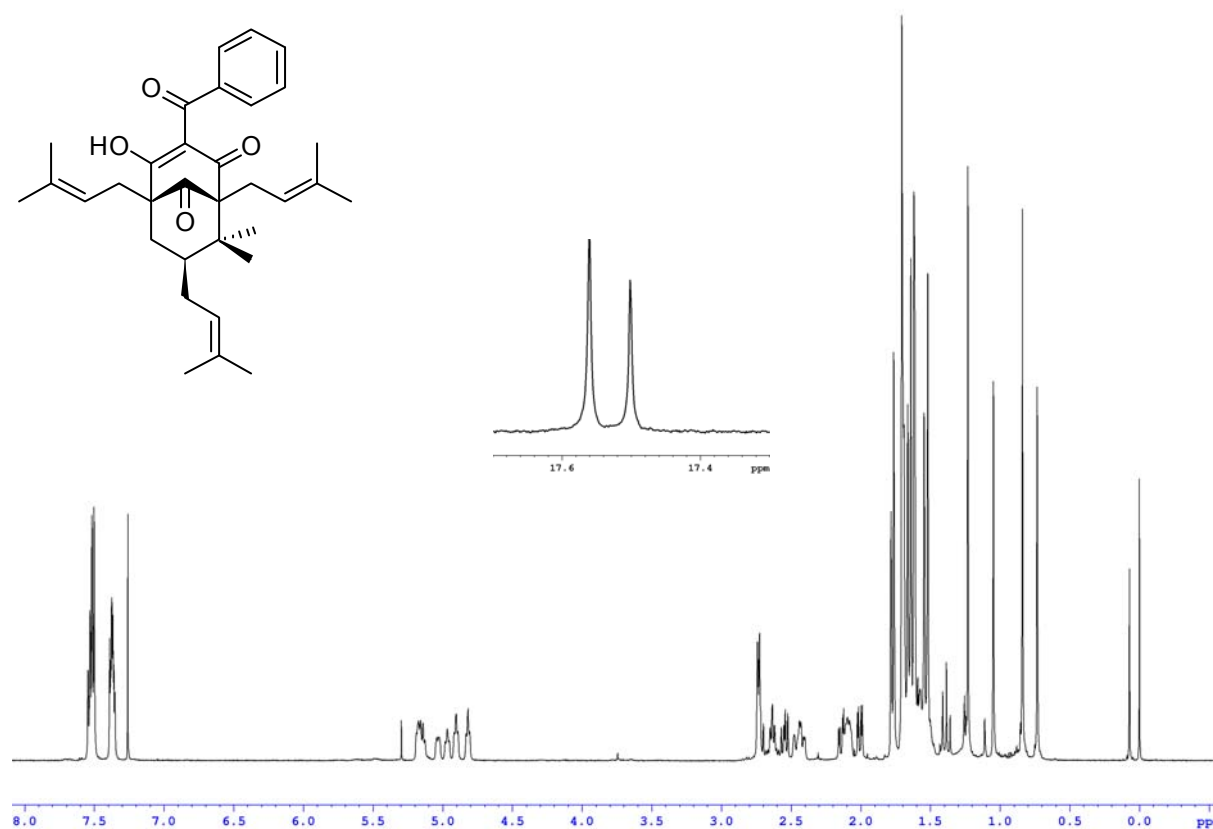

Supplementary Figure 15.  $^{13}\text{C}$  NMR spectrum of synthetic (+)-clusianone **1**  $\text{CDCl}_3$  (125 MHz):

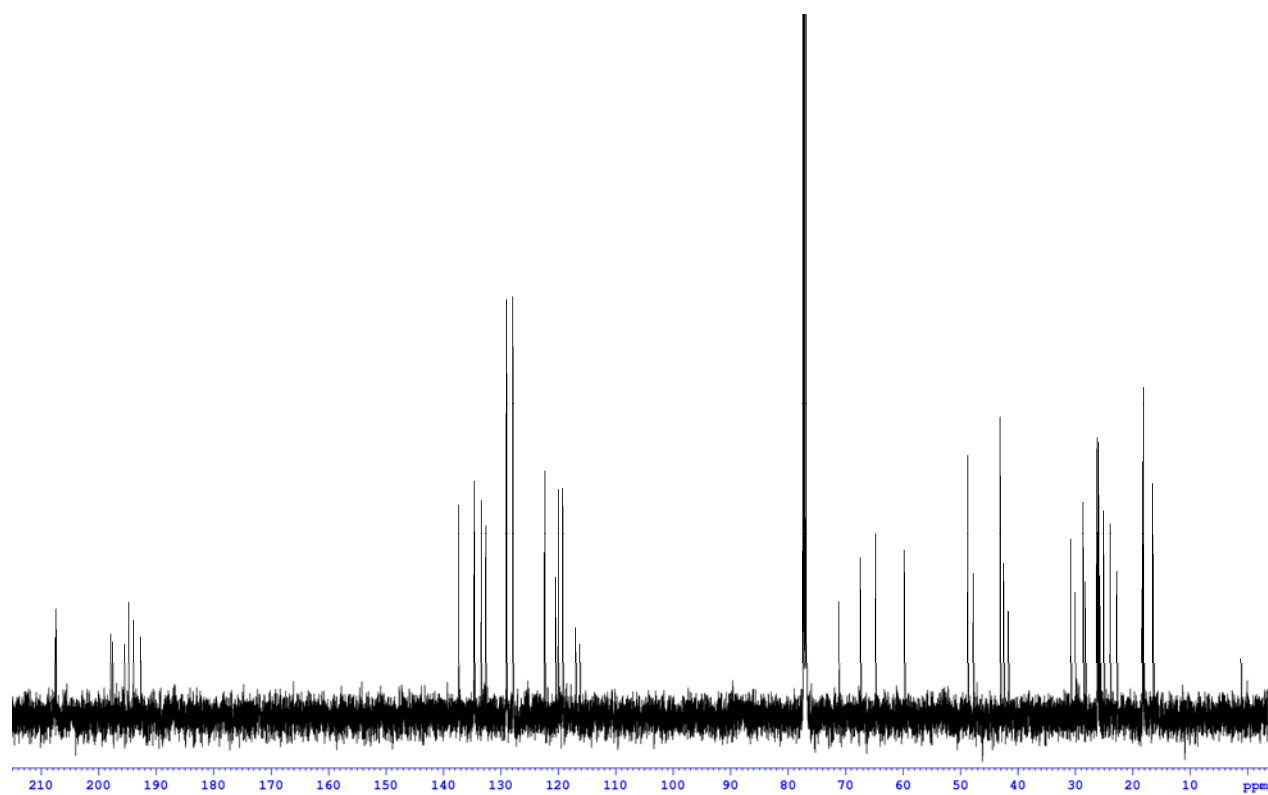

### Part III

#### Additional Information

#### Supplementary Figure 16 X-ray of compound 13

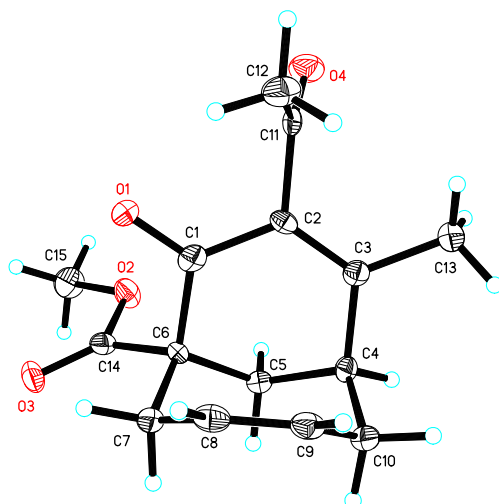

**Table 1.** Crystal data and structure refinement for **13**

|                             |                                                                                                        |
|-----------------------------|--------------------------------------------------------------------------------------------------------|
| Identification code         | s2091lm                                                                                                |
| Empirical formula           | C <sub>15</sub> H <sub>18</sub> O <sub>4</sub>                                                         |
| Formula weight              | 262.29                                                                                                 |
| Temperature                 | 100(2) K                                                                                               |
| Wavelength                  | 0.71073 Å                                                                                              |
| Crystal system, space group | Monoclinic, P 21/c                                                                                     |
| Unit cell dimensions        | a = 8.5618(7) Å alpha = 90 deg.<br>b = 8.4049(9) Å beta = 93.163(5)<br>c = 18.442(2) Å gamma = 90 deg. |
| Volume                      | 1325.1(2) Å <sup>3</sup>                                                                               |
| Z, Calculated density       | 4, 1.315 Mg/m <sup>3</sup>                                                                             |

|                                   |                                             |
|-----------------------------------|---------------------------------------------|
| Absorption coefficient            | 0.095 mm <sup>-1</sup>                      |
| F(000)                            | 560                                         |
| Crystal size                      | 0.14 x 0.13 x 0.09 mm                       |
| Theta range for data collection   | 2.21 to 26.48 deg.                          |
| Limiting indices                  | -8<=h<=10, -9<=k<=10, -19<=l<=23            |
| Reflections collected / unique    | 9858 / 2731 [R(int) = 0.0907]               |
| Completeness to theta = 26.48     | 99.6 %                                      |
| Absorption correction             | Semi-empirical from equivalents             |
| Max. and min. transmission        | 0.7438 and 0.6938                           |
| Refinement method                 | Full-matrix least-squares on F <sup>2</sup> |
| Data / restraints / parameters    | 2731 / 0 / 176                              |
| Goodness-of-fit on F <sup>2</sup> | 1.024                                       |
| Final R indices [I>2sigma(I)]     | R1 = 0.0538, wR2 = 0.0736                   |
| R indices (all data)              | R1 = 0.1314, wR2 = 0.0840                   |
| Extinction coefficient            | 0.0060(8)                                   |
| Largest diff. peak and hole       | 0.261 and -0.269 e.A <sup>-3</sup>          |

**Table 2.** Atomic coordinates ( $\times 10^4$ ) and equivalent isotropic displacement parameters ( $\text{\AA}^2 \times 10^3$ ) for s2091Im.

U(eq) is defined as one third of the trace of the orthogonalized Uij tensor.

---

|       | x        | y        | z       | U(eq) |
|-------|----------|----------|---------|-------|
| O(1)  | 546(2)   | 8607(2)  | 3504(1) | 19(1) |
| C(1)  | 1237(2)  | 7425(3)  | 3754(1) | 16(1) |
| O(2)  | 2291(2)  | 8958(2)  | 5052(1) | 22(1) |
| C(2)  | 450(2)   | 5897(3)  | 3801(1) | 14(1) |
| O(3)  | 3802(2)  | 10282(2) | 4295(1) | 24(1) |
| C(3)  | 1223(2)  | 4545(3)  | 3973(1) | 15(1) |
| O(4)  | -2225(2) | 5829(2)  | 4071(1) | 25(1) |
| C(4)  | 2961(2)  | 4547(3)  | 4150(1) | 15(1) |
| C(5)  | 3480(2)  | 6135(3)  | 4478(1) | 17(1) |
| C(6)  | 2970(2)  | 7570(3)  | 4008(1) | 14(1) |
| C(7)  | 3941(2)  | 7738(3)  | 3332(1) | 17(1) |
| C(8)  | 3549(2)  | 6561(3)  | 2735(1) | 20(1) |
| C(9)  | 3514(2)  | 4994(3)  | 2802(1) | 20(1) |
| C(10) | 3874(2)  | 4055(3)  | 3483(1) | 20(1) |
| C(11) | -1283(2) | 5905(3)  | 3602(1) | 16(1) |
| C(12) | -1762(2) | 6016(3)  | 2817(1) | 24(1) |
| C(13) | 424(2)   | 2956(3)  | 3991(1) | 23(1) |
| C(14) | 3105(2)  | 9105(3)  | 4454(1) | 17(1) |
| C(15) | 2339(3)  | 10313(3) | 5540(1) | 27(1) |

---

**Table 3.** Bond lengths [Å] and angles [deg] for s2091lm.

---

|              |          |
|--------------|----------|
| O(1)-C(1)    | 1.233(2) |
| C(1)-C(2)    | 1.455(3) |
| C(1)-C(6)    | 1.536(3) |
| O(2)-C(14)   | 1.343(2) |
| O(2)-C(15)   | 1.451(2) |
| C(2)-C(3)    | 1.344(3) |
| C(2)-C(11)   | 1.508(3) |
| O(3)-C(14)   | 1.199(3) |
| C(3)-C(13)   | 1.501(3) |
| C(3)-C(4)    | 1.506(3) |
| O(4)-C(11)   | 1.216(2) |
| C(4)-C(5)    | 1.521(3) |
| C(4)-C(10)   | 1.549(3) |
| C(4)-H(4)    | 1.0000   |
| C(5)-C(6)    | 1.535(3) |
| C(5)-H(5A)   | 0.9900   |
| C(5)-H(5B)   | 0.9900   |
| C(6)-C(14)   | 1.530(3) |
| C(6)-C(7)    | 1.543(3) |
| C(7)-C(8)    | 1.505(3) |
| C(7)-H(7A)   | 0.9900   |
| C(7)-H(7B)   | 0.9900   |
| C(8)-C(9)    | 1.323(3) |
| C(8)-H(8)    | 0.9500   |
| C(9)-C(10)   | 1.502(3) |
| C(9)-H(9)    | 0.9500   |
| C(10)-H(10A) | 0.9900   |
| C(10)-H(10B) | 0.9900   |
| C(11)-C(12)  | 1.486(3) |
| C(12)-H(12A) | 0.9800   |
| C(12)-H(12B) | 0.9800   |

|                  |            |
|------------------|------------|
| C(12)-H(12C)     | 0.9800     |
| C(13)-H(13A)     | 0.9800     |
| C(13)-H(13B)     | 0.9800     |
| C(13)-H(13C)     | 0.9800     |
| C(15)-H(15A)     | 0.9800     |
| C(15)-H(15B)     | 0.9800     |
| C(15)-H(15C)     | 0.9800     |
| O(1)-C(1)-C(2)   | 121.2(2)   |
| O(1)-C(1)-C(6)   | 119.1(2)   |
| C(2)-C(1)-C(6)   | 119.64(19) |
| C(14)-O(2)-C(15) | 116.05(19) |
| C(3)-C(2)-C(1)   | 122.46(19) |
| C(3)-C(2)-C(11)  | 121.7(2)   |
| C(1)-C(2)-C(11)  | 115.72(19) |
| C(2)-C(3)-C(13)  | 122.58(19) |
| C(2)-C(3)-C(4)   | 121.19(19) |
| C(13)-C(3)-C(4)  | 116.23(19) |
| C(3)-C(4)-C(5)   | 110.54(17) |
| C(3)-C(4)-C(10)  | 111.29(17) |
| C(5)-C(4)-C(10)  | 113.63(18) |
| C(3)-C(4)-H(4)   | 107.0      |
| C(5)-C(4)-H(4)   | 107.0      |
| C(10)-C(4)-H(4)  | 107.0      |
| C(4)-C(5)-C(6)   | 113.40(17) |
| C(4)-C(5)-H(5A)  | 108.9      |
| C(6)-C(5)-H(5A)  | 108.9      |
| C(4)-C(5)-H(5B)  | 108.9      |
| C(6)-C(5)-H(5B)  | 108.9      |
| H(5A)-C(5)-H(5B) | 107.7      |
| C(14)-C(6)-C(5)  | 110.43(18) |
| C(14)-C(6)-C(1)  | 105.90(17) |
| C(5)-C(6)-C(1)   | 110.49(18) |
| C(14)-C(6)-C(7)  | 109.19(18) |



|                     |            |
|---------------------|------------|
| C(5)-C(6)-C(7)      | 112.25(18) |
| C(1)-C(6)-C(7)      | 108.37(17) |
| C(8)-C(7)-C(6)      | 115.05(18) |
| C(8)-C(7)-H(7A)     | 108.5      |
| C(6)-C(7)-H(7A)     | 108.5      |
| C(8)-C(7)-H(7B)     | 108.5      |
| C(6)-C(7)-H(7B)     | 108.5      |
| H(7A)-C(7)-H(7B)    | 107.5      |
| C(9)-C(8)-C(7)      | 126.2(2)   |
| C(9)-C(8)-H(8)      | 116.9      |
| C(7)-C(8)-H(8)      | 116.9      |
| C(8)-C(9)-C(10)     | 126.6(2)   |
| C(8)-C(9)-H(9)      | 116.7      |
| C(10)-C(9)-H(9)     | 116.7      |
| C(9)-C(10)-C(4)     | 115.80(18) |
| C(9)-C(10)-H(10A)   | 108.3      |
| C(4)-C(10)-H(10A)   | 108.3      |
| C(9)-C(10)-H(10B)   | 108.3      |
| C(4)-C(10)-H(10B)   | 108.3      |
| H(10A)-C(10)-H(10B) | 107.4      |
| O(4)-C(11)-C(12)    | 122.51(19) |
| O(4)-C(11)-C(2)     | 120.55(19) |
| C(12)-C(11)-C(2)    | 116.93(18) |
| C(11)-C(12)-H(12A)  | 109.5      |
| C(11)-C(12)-H(12B)  | 109.5      |
| H(12A)-C(12)-H(12B) | 109.5      |
| C(11)-C(12)-H(12C)  | 109.5      |
| H(12A)-C(12)-H(12C) | 109.5      |
| H(12B)-C(12)-H(12C) | 109.5      |
| C(3)-C(13)-H(13A)   | 109.5      |
| C(3)-C(13)-H(13B)   | 109.5      |
| H(13A)-C(13)-H(13B) | 109.5      |
| C(3)-C(13)-H(13C)   | 109.5      |
| H(13A)-C(13)-H(13C) | 109.5      |

|                     |          |
|---------------------|----------|
| H(13B)-C(13)-H(13C) | 109.5    |
| O(3)-C(14)-O(2)     | 124.3(2) |
| O(3)-C(14)-C(6)     | 126.0(2) |
| O(2)-C(14)-C(6)     | 109.6(2) |
| O(2)-C(15)-H(15A)   | 109.5    |
| O(2)-C(15)-H(15B)   | 109.5    |
| H(15A)-C(15)-H(15B) | 109.5    |
| O(2)-C(15)-H(15C)   | 109.5    |
| H(15A)-C(15)-H(15C) | 109.5    |
| H(15B)-C(15)-H(15C) | 109.5    |

---

Symmetry transformations used to generate equivalent atoms:

**Table 4.** Anisotropic displacement parameters ( $\text{\AA}^2 \times 10^3$ ) for s2091lm.

The anisotropic displacement factor exponent takes the form:

$$-2 \pi^2 [ h^2 a^{*2} U_{11} + \dots + 2 h k a^* b^* U_{12} ]$$

---

|      | U11   | U22   | U33   | U23   | U13  | U12   |
|------|-------|-------|-------|-------|------|-------|
| O(1) | 16(1) | 16(1) | 25(1) | 2(1)  | 3(1) | 3(1)  |
| C(1) | 19(1) | 18(2) | 11(1) | -2(1) | 6(1) | 3(1)  |
| O(2) | 25(1) | 18(1) | 24(1) | -7(1) | 9(1) | -5(1) |
| C(2) | 13(1) | 18(1) | 10(1) | -1(1) | 4(1) | -3(1) |
| O(3) | 26(1) | 14(1) | 34(1) | 0(1)  | 8(1) | -5(1) |
| C(3) | 16(1) | 16(2) | 14(1) | 0(1)  | 4(1) | 1(1)  |
| O(4) | 19(1) | 30(1) | 28(1) | 2(1)  | 8(1) | 2(1)  |

|       |       |       |       |        |       |       |
|-------|-------|-------|-------|--------|-------|-------|
| C(4)  | 16(1) | 12(1) | 18(1) | 4(1)   | 0(1)  | 1(1)  |
| C(5)  | 13(1) | 16(1) | 20(1) | 0(1)   | 1(1)  | 1(1)  |
| C(6)  | 11(1) | 12(1) | 20(1) | 1(1)   | 3(1)  | -2(1) |
| C(7)  | 15(1) | 17(2) | 21(1) | 2(1)   | 4(1)  | 1(1)  |
| C(8)  | 16(1) | 29(2) | 17(1) | 1(1)   | 4(1)  | 0(1)  |
| C(9)  | 15(1) | 25(2) | 20(1) | -5(1)  | 4(1)  | -1(1) |
| C(10) | 14(1) | 18(1) | 26(1) | -2(1)  | 1(1)  | 1(1)  |
| C(11) | 18(1) | 8(1)  | 23(1) | -3(1)  | 2(1)  | 0(1)  |
| C(12) | 19(1) | 30(2) | 24(1) | -4(1)  | -2(1) | 3(1)  |
| C(13) | 20(1) | 17(2) | 32(2) | -2(1)  | 4(1)  | -1(1) |
| C(14) | 12(1) | 19(2) | 21(1) | 3(1)   | 0(1)  | 0(1)  |
| C(15) | 30(2) | 23(2) | 29(2) | -12(1) | 7(1)  | 0(1)  |

---

**Table 5.** Hydrogen coordinates (  $\times 10^4$ ) and isotropic displacement parameters ( $\text{\AA}^2 \times 10^3$ ) for s2091lm.

---

|        | x    | y    | z    | U(eq) |
|--------|------|------|------|-------|
| H(4)   | 3175 | 3719 | 4532 | 18    |
| H(5A)  | 4635 | 6139 | 4550 | 20    |
| H(5B)  | 3042 | 6246 | 4961 | 20    |
| H(7A)  | 3791 | 8825 | 3134 | 21    |
| H(7B)  | 5062 | 7621 | 3486 | 21    |
| H(8)   | 3303 | 6983 | 2265 | 25    |
| H(9)   | 3233 | 4402 | 2375 | 24    |
| H(10A) | 5007 | 4151 | 3615 | 23    |

|        |       |       |      |    |
|--------|-------|-------|------|----|
| H(10B) | 3655  | 2919  | 3378 | 23 |
| H(12A) | -2907 | 6029  | 2755 | 37 |
| H(12B) | -1356 | 5095  | 2561 | 37 |
| H(12C) | -1341 | 6996  | 2616 | 37 |
| H(13A) | 132   | 2730  | 4487 | 34 |
| H(13B) | 1136  | 2128  | 3834 | 34 |
| H(13C) | -518  | 2974  | 3664 | 34 |
| H(15A) | 3391  | 10412 | 5774 | 41 |
| H(15B) | 1579  | 10158 | 5912 | 41 |
| H(15C) | 2080  | 11283 | 5265 | 41 |

---

**Table 6.** Torsion angles [deg] for s2091lm.

---

|                       |             |
|-----------------------|-------------|
| O(1)-C(1)-C(2)-C(3)   | 170.3(2)    |
| C(6)-C(1)-C(2)-C(3)   | -8.7(3)     |
| O(1)-C(1)-C(2)-C(11)  | -6.3(3)     |
| C(6)-C(1)-C(2)-C(11)  | 174.75(17)  |
| C(1)-C(2)-C(3)-C(13)  | -177.4(2)   |
| C(11)-C(2)-C(3)-C(13) | -1.0(3)     |
| C(1)-C(2)-C(3)-C(4)   | 1.9(3)      |
| C(11)-C(2)-C(3)-C(4)  | 178.23(18)  |
| C(2)-C(3)-C(4)-C(5)   | 29.0(3)     |
| C(13)-C(3)-C(4)-C(5)  | -151.67(18) |
| C(2)-C(3)-C(4)-C(10)  | -98.2(2)    |
| C(13)-C(3)-C(4)-C(10) | 81.1(2)     |
| C(3)-C(4)-C(5)-C(6)   | -53.8(2)    |
| C(10)-C(4)-C(5)-C(6)  | 72.2(2)     |
| C(4)-C(5)-C(6)-C(14)  | 163.84(17)  |
| C(4)-C(5)-C(6)-C(1)   | 47.0(2)     |
| C(4)-C(5)-C(6)-C(7)   | -74.1(2)    |
| O(1)-C(1)-C(6)-C(14)  | 45.3(2)     |

|                       |             |
|-----------------------|-------------|
| C(2)-C(1)-C(6)-C(14)  | -135.7(2)   |
| O(1)-C(1)-C(6)-C(5)   | 164.91(19)  |
| C(2)-C(1)-C(6)-C(5)   | -16.1(3)    |
| O(1)-C(1)-C(6)-C(7)   | -71.7(2)    |
| C(2)-C(1)-C(6)-C(7)   | 107.3(2)    |
| C(14)-C(6)-C(7)-C(8)  | -162.31(18) |
| C(5)-C(6)-C(7)-C(8)   | 74.9(2)     |
| C(1)-C(6)-C(7)-C(8)   | -47.4(3)    |
| C(6)-C(7)-C(8)-C(9)   | -53.7(3)    |
| C(7)-C(8)-C(9)-C(10)  | -0.7(4)     |
| C(8)-C(9)-C(10)-C(4)  | 52.9(3)     |
| C(3)-C(4)-C(10)-C(9)  | 53.9(3)     |
| C(5)-C(4)-C(10)-C(9)  | -71.6(2)    |
| C(3)-C(2)-C(11)-O(4)  | 78.8(3)     |
| C(1)-C(2)-C(11)-O(4)  | -104.6(2)   |
| C(3)-C(2)-C(11)-C(12) | -101.4(2)   |
| C(1)-C(2)-C(11)-C(12) | 75.1(2)     |
| C(15)-O(2)-C(14)-O(3) | -2.7(3)     |
| C(15)-O(2)-C(14)-C(6) | 178.57(17)  |
| C(5)-C(6)-C(14)-O(3)  | 126.5(2)    |
| C(1)-C(6)-C(14)-O(3)  | -113.9(2)   |
| C(7)-C(6)-C(14)-O(3)  | 2.6(3)      |
| C(5)-C(6)-C(14)-O(2)  | -54.8(2)    |
| C(1)-C(6)-C(14)-O(2)  | 64.9(2)     |
| C(7)-C(6)-C(14)-O(2)  | -178.65(17) |

---

Symmetry transformations used to generate equivalent atoms:

## Part V Supplementary References

- [1] F. Horeischi, N. Biber, B. Plietker, *J. Am. Chem. Soc.*, 2014, **136**, 4026.
- [2] N. Biber, K. Möws, B. Plietker, *Nature Chem.* 2011, **3**, 938.
- [3] B. M. Trost, B. Schöffner, M. Osipov, D. A. A. Wilton, *Angew. Chem. Int. Ed.*, 2011, **50**, 3548.
- [4] J. H. Boyce, J. A. Porco Jr., *Angew. Chem. Int. Ed.*, 2014, **53**, 7832.
